# Supplementary material for: Uncovering a novel function of the CCR4-NOT complex in phytochrome A-mediated light signalling in plants
Source: eLife. 2021 Mar 30;10:e63697. doi: 10.7554/eLife.63697 (PMC8009681; doi:10.7554/eLife.63697)
Supplement: Supplementary file 1. — Protein hits with at least two unique peptide matches in any of the samples were included in this list. [file elife-63697-supp1.csv]

				HA-YFP #1			HA-YFP #2			HA-YFP #3			HA-YFP-NOT9B #1			HA-YFP-NOT9B #2			HA-YFP-NOT9B #3
	Rank	Uniprot identifier	Gene	Number Unique Peptides	Peptide Count	% Coverage	Number Unique Peptides	Peptide Count	% Coverage	Number Unique Peptides	Peptide Count	% Coverage	Number Unique Peptides	Peptide Count	% Coverage	Number Unique Peptides	Peptide Count	% Coverage	Number Unique Peptides	Peptide Count	% Coverage	Protein MW	Species	Protein Name
1	[1]	2	HA-YFP-NOT9B										71	891	89.5	57	951	86.7	74	1243	88.4	63248.1		HA-YFP-NOT9
2	[1-4]	1	YFP-HA	34	1348	88.4	34	1795	87.6	25	922	85.2										28234.1		YFP-HA
3	[2]	A0A1P8ARB7	At1g02080										64	171	36.1	19	46	10.1	25	50	13.5	263894.7	ARATH	Transcription regulator
4	[3]	Q96318	CRC	7	35	19.5	3	13	7.3	12	49	33.2	47	317	84.9	33	192	73.5	36	159	83	58235.7	ARATH	12S seed storage protein CRC
5	[4]	P04264	KRT1	43	640	53.4	50	1234	65.5	50	1578	65.7	44	253	58.2	41	329	51.9	47	464	58.7	66039.2	HUMAN	Keratin, type II cytoskeletal 1
6	[5]	P35527	KRT9	40	705	59.6	43	755	64.7	45	1200	75.9	40	196	62.1	35	216	42.1	44	276	64	62064.8	HUMAN	Keratin, type I cytoskeletal 9
7	[6]	P0DKC5	HSD1	2	7	4.9	14	94	44.4	10	67	34.4	35	176	75.6	19	91	54.2	29	151	78.2	39087.3	ARATH	11-beta-hydroxysteroid dehydrogenase 1A
8	[7]	P15455	CRA1	3	5	8.9	7	15	21.4	6	29	19.7	28	196	71.6	14	61	44.3	24	90	58.3	52595.5	ARATH	12S seed storage protein CRA1
9	[8]	Q9FLH2	MPA24.10										35	95	42.4	11	33	15.2	20	48	27.7	116400.1	ARATH	2-oxoglutarate dehydrogenase, E1 component
10	[9]	Q0WLB5	CHC2										31	54	20	24	61	15.4	37	101	26.4	193272.8	ARATH	Clathrin heavy chain 2
11	[10]	P22953	MED37E	2	13	3.5	5	12	10.8	2	3	4.8	28	72	53.1	10	29	21.8	23	71	45.6	71358.4	ARATH	Probable mediator of RNA polymerase II transcription subunit 37e
12	[11]	P02768	ALB	24	594	30	24	563	27.3	29	768	30.9	6	38	9.9	11	105	14.4	11	58	14.9	69367.4	HUMAN	Serum albumin
13	[12]	O04310	JAL34	2	7	4.7	9	41	20.3	13	56	29.2	20	87	43.8	10	46	23.4	18	79	37.4	72474.1	ARATH	Jacalin-related lectin 34
14	[13]	Q9SR37	BGLU23				6	32	14.1	8	28	15.5	24	101	60.5	8	28	17.6	18	80	40.5	59721.1	ARATH	Beta-glucosidase 23
15	[14]	Q86YZ3	HRNR	3	67	1.9	8	90	4.6	14	186	9.1	5	18	3.4	7	21	3.8	5	29	2.6	282391.8	HUMAN	Hornerin
16	[15]	P15924	DSP	13	36	3.9	8	37	3.7	30	106	10.9	6	7	2.6	7	11	2.7	12	16	4.9	331776.7	HUMAN	Desmoplakin
17	[16]	P28297	ICL	3	3	5.4							16	45	40.3	6	22	12	21	51	45.1	64245.4	ARATH	Isocitrate lyase
18	[17]	Q38882	PLDALPHA1	4	9	8.9	11	44	23.2	5	10	11.9	18	40	33.2	7	21	12.3	13	31	28.4	91848.8	ARATH	Phospholipase D alpha 1
19	[18]	Q42547	CAT3	9	64	21.7	8	17	21.7	7	14	18.3	18	58	48.2	14	78	41.9	16	91	48	56695.8	ARATH	Catalase-3
20	[19]	Q93ZI7	MOK9.1										20	40	29.3	4	6	8.3	4	6	8.7	86738.7	ARATH	AT5g35440/MOK9_2
21	[20]	Q6IFW6	Krt10	18	168	19.6	21	312	21.3	20	484	19.6	18	72	19.6	20	131	19.6	21	126	21.5	56505.5	RAT	Keratin, type I cytoskeletal 10
22	[21]	Q8L7S8	RH3				2	8	3.6	3	7	5.2	21	53	35.8	11	34	18.7	14	35	27.1	81157	ARATH	DEAD-box ATP-dependent RNA helicase 3, chloroplastic
23	[22]	Q9MAB3	NOP5-2	3	10	8.6	12	68	30	11	51	24.8	16	42	35.5	8	21	18.9	18	53	42	59003.7	ARATH	Probable nucleolar protein 5-2
24	[23]	P19456	AHA2				3	4	4.3				21	45	29.4	14	46	18.9	18	41	25.4	104402.3	ARATH	ATPase 2, plasma membrane-type
25	[24]	F4I9U3	At1g65090				3	12	12.9	3	10	12.9	16	61	36.9	9	21	25.6	7	16	25.6	41866.6	ARATH	Nucleolin
26	[25]	Q9SGT7	NOP56	1	6	2.7	10	37	25.5	8	28	18.2	18	43	38.1	8	21	15.7	19	47	49.4	58673.8	ARATH	At1g56110/T6H22_9
27	[26]	P17094	ARP1	4	15	9.3	7	26	17	7	25	17	21	60	45.5	8	30	15.9	14	37	29	44559.5	ARATH	60S ribosomal protein L3-1
28	[27]	O81270	PXG1				4	6	18.4	2	5	8.6	16	58	72.7	9	31	29.8	9	40	44.1	28038.3	ARATH	Peroxygenase 1
29	[28]	Q9LUT2	METK4	3	8	10.9							13	24	47.3	9	44	29.3	15	65	52.7	42796	ARATH	S-adenosylmethionine synthase 4
30	[29]	Q42431	OL2	6	59	37.7	8	162	38.7	9	143	38.7	12	455	39.3	10	389	37.7	10	396	38.7	20313.3	ARATH	Oleosin 20.3 kDa
31	[30]	Q9LD90	CBF5	4	10	6.5	7	58	14.3	7	55	13.3	17	64	30.1	11	52	14.9	20	69	32.2	63026.9	ARATH	H/ACA ribonucleoprotein complex subunit 4
32	[31]	Q9SF40	RPL4A	3	6	11.1	7	30	23.2	8	30	25.4	18	54	41.1	11	39	26.6	12	56	32	44702.5	ARATH	60S ribosomal protein L4-1
33	[32]	A0A178V719	AXX17_At4g41800	5	43	10.4	7	112	20.4	7	83	16.6	10	54	34.3	7	100	22	12	117	38.9	58699.9	ARATH	Uncharacterized protein
34	[33]	O65449	sks4	1	4	2.4	4	10	10	1	1	3	17	53	36.6	4	7	15.3	6	11	15	60456.3	ARATH	At4g22010
35	[34]	B4F7N8	At5g18420										15	42	42.1	5	6	18.8	6	10	19	50446.3	ARATH	At5g18420
36	[35]	Q9ASR1	LOS1	3	8	4.3							15	28	21.2	7	18	11.5	16	35	24.4	93892	ARATH	Elongation factor 2
37	[36]	P01870		11	70	22.3	14	129	24.5	16	124	24.5	6	12	18.6	8	28	21.4	11	22	21.4	35404.6	RABIT	Ig gamma chain C region
38	[37]	P25858	GAPC1	2	10	8.3	2	3	8.6	2	3	8.6	14	38	45	7	20	29.3	9	39	33.1	36914.6	ARATH	Glyceraldehyde-3-phosphate dehydrogenase GAPC1, cytosolic
39	[38]	O64948	LON2										16	30	24.1	10	26	13.2	16	33	24	97862.6	ARATH	Lon protease homolog 2, peroxisomal
40	[39]	P55737	HSP90-2	3	8	4.7	1	3	2	1	2	2	12	24	17.9	11	22	19.9	16	33	28.6	80064.7	ARATH	Heat shock protein 90-2
41	[40]	P29525	At4g25140	3	5	19.1	8	209	25.4	8	148	27.2	12	229	36.4	10	151	31.2	11	212	32.4	18569.2	ARATH	Oleosin 18.5 kDa
42	[41]	Q8RWZ3	IBR3										14	31	20.4	4	7	5.9	6	12	9.3	91713.8	ARATH	Probable acyl-CoA dehydrogenase IBR3
43	[42]	P0DH99	A1	3	16	5.6				3	10	5.8	14	42	30.5	8	30	13.1	15	50	39.2	49502.7	ARATH	Elongation factor 1-alpha 1
44	[43]	P83483	At5g08670	1	4	2.5							8	16	23.6				13	25	34.4	59671.4	ARATH	ATP synthase subunit beta-1, mitochondrial
45	[44]	P49204	RPS4B	1	11	3.1	7	47	26.7	7	50	26.7	16	53	49.2	10	39	37	11	48	43.5	29874.2	ARATH	40S ribosomal protein S4-2
46	[45]	O65201	ACX2										14	20	27	4	13	6.8	7	10	14.7	77481.1	ARATH	Acyl-coenzyme A oxidase 2, peroxisomal
47	[46]	Q9LZC3	MLS	2	8	5.3							15	27	30.4	7	20	13.3	12	25	21.2	63887.7	ARATH	Malate synthase
48	[47]	Q02413	DSG1	4	8	3.7	4	5	5.4	14	41	13.5	4	5	4.5	4	7	4.8	4	5	5.6	113748.6	HUMAN	Desmoglein-1
49	[48]	Q8LA13	RH11				1	2	2	1	2	2	13	22	30.6	5	9	9.8	7	12	18	66026.2	ARATH	DEAD-box ATP-dependent RNA helicase 11
50	[49]	Q9FJA6	RPS3C	2	15	8.5	7	26	31.5	5	25	23.4	16	42	68.1	8	25	35.1	12	35	48.8	27458.4	ARATH	40S ribosomal protein S3-3
51	[50]	P93004	PIP2-7										9	17	48.9	5	44	37.9	9	30	48.9	29742.9	ARATH	Aquaporin PIP2-7
52	[51]	Q96292	ACT2	5	18	13.8	2	6	4	2	7	4.8	13	31	40.3	12	36	39.8	12	41	43.5	41877.3	ARATH	Actin-2
53	[52]	O03042	rbcL	6	29	12.9	9	58	23.4	8	40	22.8	12	40	34.9	11	23	41.1	13	61	43.6	52955.5	ARATH	Ribulose bisphosphate carboxylase large chain
54	[53]	Q9LQ31	JAL4										12	22	25	3	6	4.4	9	16	16	81843.4	ARATH	Jacalin-related lectin 4
55	[54]	Q93VG5	RPS8A	5	12	19.4	5	26	28.4	5	18	26.6	10	38	43.7	9	40	37.8	10	37	41	24993.8	ARATH	40S ribosomal protein S8-1
56	[55]	P01009	SERPINA1	8	48	34.2	9	43	37.1	11	60	36.1	2	2	5.5	5	18	14.8	2	9	5.5	46736.9	HUMAN	Alpha-1-antitrypsin
57	[56]	P31167	AAC1	4	20	7.1	7	29	18.1	6	19	15.5	14	45	24.9	7	27	20.5	14	54	31.5	41475.9	ARATH	ADP,ATP carrier protein 1, mitochondrial
58	[57]	Q9FMF5	RPT3										13	18	23.5	4	7	5.5	13	22	23.7	81874	ARATH	Root phototropism protein 3
59	[58]	Q9CAV0	RPS3AA	1	2	7.3	5	26	28.2	6	20	26	12	34	45.8	6	24	21.8	12	39	46.2	29850.9	ARATH	40S ribosomal protein S3a-1
60	[59]	P17745	TUFA	1	3	2.3	4	5	11.8	2	3	4.8	12	28	29.6	5	11	12	9	20	29.6	51630.6	ARATH	Elongation factor Tu, chloroplastic
61	[60]	P14712	PHYA	1	3	1.1							9	18	9.8	5	19	6.3	13	35	13.8	124502.1	ARATH	Phytochrome A
62	[61]	Q9ZWA9	CRD										10	19	35.7	6	14	18.8	4	5	15.3	49675.3	ARATH	12S seed storage protein CRD
63	[62]	Q9T0G0	HSD5										11	24	36.2	1	3	5.1	3	5	12.6	43442.1	ARATH	11-beta-hydroxysteroid dehydrogenase-like 5
64	[63]	O50008	MS1	3	11	4.2	3	10	4.4	4	9	6	11	20	20	5	14	8.4	10	25	19.1	84357.4	ARATH	5-methyltetrahydropteroyltriglutamate--homocysteine methyltransferase 1
65	[64]	P42697	DRP1A										14	21	23.6	9	20	15.4	14	31	25.6	68172.9	ARATH	Dynamin-related protein 1A
66	[65]	P21240	CPN60B1	2	11	4.2	1	2	2.3	1	4	2.3	7	9	11.8	3	4	5.8	13	21	25.8	63809.7	ARATH	Chaperonin 60 subunit beta 1, chloroplastic
67	[66]	F4JEL5	EIF4A1	2	5	5.7	1	2	3.2	1	1	3.2	12	24	28.3	13	31	29.2	13	36	37.6	46137.3	ARATH	Eukaryotic translation initiation factor 4A1
68	[67]	O81416	At4g02290				1	2	1.7	1	4	1.7	10	30	27.5	5	9	16.1	7	15	19.8	57301.7	ARATH	Endoglucanase 17
69	[68]	Q06611	PIP1-2										7	14	51.7	1	9	9.1	6	52	39.5	30597.9	ARATH	Aquaporin PIP1-2
70	[69]	O04309	JAL35										9	19	33	3	5	9.8	6	13	22.4	48496.9	ARATH	Jacalin-related lectin 35
71	[70]	O23654	VHA-A										11	19	22.8	5	12	9.1	11	18	22	68813.1	ARATH	V-type proton ATPase catalytic subunit A
72	[71]	P00761		8	68	26.8	7	86	25.1	9	71	26.8	5	28	25.1	9	34	26.8	8	48	25.1	24409.7	PIG	Trypsin
73	[72]	Q9LUJ7	PAP85				2	3	6.4	1	1	3.3	10	23	25.9	5	17	12.8	8	24	21.8	55063.6	ARATH	Vicilin-like seed storage protein At3g22640
74	[73]	Q9LVA0	BAG7				1	1	4.5	1	1	4.5	9	22	25.6	6	18	15.5	10	26	32.7	51567.8	ARATH	BAG family molecular chaperone regulator 7
75	[74]	Q9LQ55	DRP2B										9	12	11.1	4	10	5.3	12	20	15	100229	ARATH	Dynamin-2B
76	[75]	Q94AH9	MED36A	2	2	7.2	9	62	31.9	10	53	34.1	12	33	45.9	9	44	31.6	9	40	31.6	33653.6	ARATH	Mediator of RNA polymerase II transcription subunit 36a
77	[76]	Q9ZVJ6	ANN4										5	8	16.9	6	15	21	10	22	43.3	36221.7	ARATH	Annexin D4
78	[77]	Q56WD9	PED1										9	20	31.2	3	7	10.4	5	13	15.6	48579.1	ARATH	3-ketoacyl-CoA thiolase 2, peroxisomal
79	[78]	P49209	RPL9B	1	3	4.1	5	22	32	6	22	35.6	10	37	53.6	7	27	37.1	12	35	59.3	22017.8	ARATH	60S ribosomal protein L9-1
80	[79]	O81493	F9D12.8				2	5	4.8	4	12	12.5	11	26	33	3	9	8.3	6	21	19.4	39826.6	ARATH	F9D12.8 protein
81	[80]	P02787	TF	8	222	17.3	5	165	14.6	8	247	15.6	3	5	10.2	5	26	14.6	5	24	14.6	77064.7	HUMAN	Serotransferrin
82	[81]	P0DH95	CAM1	3	7	28.9	3	7	26.2	3	6	26.2	11	23	55	4	11	33.6	6	18	41.6	16861.9	ARATH	Calmodulin-1
83	[82]	Q8N1N4	KRT78	3	22	4.6	10	59	18.3	14	74	24.6	6	15	11.5	3	15	4.6	8	20	15	56866.3	HUMAN	Keratin, type II cytoskeletal 78
84	[83]	P49688	RPS2C	2	4	7.7	7	37	26.7	7	43	26.7	9	40	37.5	9	35	35.8	8	37	31.6	30878.9	ARATH	40S ribosomal protein S2-3
85	[84]	Q56YW9	TUBB2	2	5	6.4	3	6	9.6	2	2	5.6	10	20	26.4	6	20	20	9	29	26	50734.4	ARATH	Tubulin beta-2 chain
86	[85]	Q8LF21	DRP1C										8	9	15.6	5	10	9.9	9	17	20.2	68723.2	ARATH	Dynamin-related protein 1C
87	[86]	A0A178UVT6	AXX17_At4g24180										7	9	6.8	4	6	3.5	10	14	8.8	152369.3	ARATH	TPP2
88	[87]	P00450	CP	5	14	7.8	5	17	9.8	7	43	10.1				3	10	6.7	1	5	1.9	122206.2	HUMAN	Ceruloplasmin
89	[88]	P49227	RPL5B				4	12	17.3	4	12	14.6	10	41	34.2	7	21	31.2	8	23	30.9	34437.2	ARATH	60S ribosomal protein L5-2
90	[89]	Q8LD03	RPS7C				5	8	39.5	4	6	25.8	9	23	48.9	4	9	34.7	8	20	44.7	22060.9	ARATH	40S ribosomal protein S7-3
91	[90]	Q39165	At5g40420	5	49	23.1	7	158	31.7	6	112	23.1	8	140	24.1	8	92	28.1	8	100	24.1	21279.6	ARATH	Oleosin 21.2 kDa
92	[91]	P60040	RPL7B	2	4	7.9	8	33	28.5	10	44	36.4	12	47	46.7	7	44	30.2	9	30	32.6	28171.3	ARATH	60S ribosomal protein L7-2
93	[92]	Q9ZPI5	MFP2										12	19	20	4	7	5.9	10	22	20.8	78840.8	ARATH	Peroxisomal fatty acid beta-oxidation multifunctional protein MFP2
94	[93]	Q9FZ42	ChlADR1										7	16	35.1	2	4	13.9	6	9	28.5	31387.7	ARATH	NADPH-dependent aldehyde reductase 1, chloroplastic
95	[94]	P51430	RPS6B	2	9	9.2	3	20	18.9	4	22	17.3	11	40	38.2	6	26	25.7	10	30	40.2	28162.2	ARATH	40S ribosomal protein S6-2
96	[95]	Q39099	XTH4										10	19	32.8	2	4	5.4	4	5	16.6	34291.4	ARATH	Xyloglucan endotransglucosylase/hydrolase protein 4
97	[96]	Q9FXA2	PAB8										10	20	21.6	3	3	5.7	2	3	5.8	72780	ARATH	Polyadenylate-binding protein 8
98	[97]	Q8W4H8	GLL23	1	4	2.6	4	8	15.5	2	7	5.7	9	18	33.2	4	5	18.1	6	8	21.5	43143.6	ARATH	Inactive GDSL esterase/lipase-like protein 23
99	[98]	P01024	C3	2	32	2.6	5	9	6.9	7	15	9.3				2	3	2.3	2	2	2.8	187149.7	HUMAN	Complement C3
100	[99]	P42644	GRF3	2	15	7.8				1	1	3.1	8	12	39.6	3	7	15.3	6	16	28.2	28606.5	ARATH	14-3-3-like protein GF14 psi
101	[100]	P15460	AT2S4				3	31	16.9	2	20	12.7	10	61	32.5	6	50	27.7	9	55	31.9	19169.2	ARATH	2S seed storage protein 4
102	[101]	Q9FNE4	MPO12.6				1	1	1				2	2	2.4	3	3	3.6	11	20	14.1	114240.3	ARATH	Tudor/PWWP/MBT superfamily protein
103	[102]	Q9FX95	NQR										10	23	23.2	3	5	6.4	5	8	10.3	67944.8	ARATH	ARP protein
104	[103]	A0A178UIJ0	AXX17_At5g20440										12	13	9.7	7	11	5.8	9	13	7.2	172554.9	ARATH	XIK
105	[104]	P46286	RPL8A				2	5	10.1				8	20	33.3	5	11	16.3	6	19	30.6	27859.4	ARATH	60S ribosomal protein L8-1
106	[105]	Q9LRS0	GLO2										11	16	35.1	4	7	10.1	10	16	31.9	40306.9	ARATH	(S)-2-hydroxy-acid oxidase GLO2
107	[106]	Q9FKA5	At5g39570										7	27	23.9							43526.5	ARATH	Uncharacterized protein At5g39570
108	[107]	Q9LU74	MUL3.6	4	19	21.2	7	35	30.9	9	36	30.9	6	8	20.6	4	8	19.1	5	9	21.5	37581.9	ARATH	AT5g57120/MUL3_6
109	[108]	P34788	RPS18A	2	2	14.5	5	14	41.4	4	19	33.6	9	32	54.6	4	8	33.6	8	23	50	17545.6	ARATH	40S ribosomal protein S18
110	[109]	Q8S944	DRP3A										9	14	14.6	4	5	6.8	8	13	12.9	89627.6	ARATH	Dynamin-related protein 3A
111	[110]	Q08112	RPS15A	2	4	21.1	3	11	33.6	2	12	21.1	8	21	46.7	4	17	41.4	5	16	41.4	17129.4	ARATH	40S ribosomal protein S15-1
112	[111]	P01023	A2M	5	18	7.1	4	14	7.8	6	14	10.2	1	1	1.4	1	2	1.4	2	2	4.5	163292.4	HUMAN	Alpha-2-macroglobulin
113	[112]	Q9SCX3	At5g19510	1	3	6.2							4	4	23.7	2	2	10.3	7	14	41.5	24201.3	ARATH	Elongation factor 1-beta 2
114	[113]	P29511	TUBA6	3	12	7.1	2	7	5.6	2	5	5.6	8	17	25.1	5	16	11.8	8	21	23.1	49538.3	ARATH	Tubulin alpha-6 chain
115	[114]	A0A178VCE1	AXX17_At3g17230										5	6	16.2	2	4	6	8	12	25.1	51614.3	ARATH	Uncharacterized protein
116	[115]	P54609	CDC48A	2	8	3.1							3	4	3.7	5	11	6.4	10	16	14.8	89394.2	ARATH	Cell division control protein 48 homolog A
117	[116]	P10797	RBCS-2B	3	28	14.9	3	11	15.5				9	22	52.5	4	14	21	9	30	52.5	20350.5	ARATH	Ribulose bisphosphate carboxylase small chain 2B, chloroplastic
118	[117]	O22607	MSI4	2	5	6.9	5	16	18.1	3	7	9.7	8	16	26.8	4	15	10.3	6	22	21.5	55759.6	ARATH	WD-40 repeat-containing protein MSI4
119	[118]	Q9FZ76	RPL6A				2	5	9.4	1	4	3.4	9	21	32.2	5	18	13.7	5	14	23.2	26152.9	ARATH	60S ribosomal protein L6-1
120	[119]	A0A178UPP6	AXX17_At5g28880										7	10	26.2	5	7	17.2	7	16	29.3	45994.1	ARATH	BIP1
121	[120]	Q9SIB9	ACO3	1	4	1							5	6	7.2	3	3	3	8	15	10.7	108202.2	ARATH	Aconitate hydratase 3, mitochondrial
122	[121]	Q56ZI2	PATL2										10	12	20.2	3	5	6.1	5	5	11	76008.6	ARATH	Patellin-2
123	[122]	Q8H107	At4g26910										8	26	19.6	2	4	4.3	1	3	1.7	50059.6	ARATH	Dihydrolipoyllysine-residue succinyltransferase component of 2-oxoglutarate dehydrogenase complex 2, mitochondrial
124	[123]	Q9FHQ3	HSP15.7										9	25	62.8	5	7	25.5	7	19	46.7	15698	ARATH	15.7 kDa heat shock protein, peroxisomal
125	[124]	Q03250	RBG7	1	2	8	4	11	27.3	3	3	19.3	6	17	43.8	4	11	30.1	6	15	46.6	16889.9	ARATH	Glycine-rich RNA-binding protein 7
126	[125]	P93819	MDH1	4	16	14.2	1	1	3.6				3	4	8.4	4	6	14.2	9	14	30.7	35571.3	ARATH	Malate dehydrogenase 1, cytoplasmic
127	[126]	Q9SS98	At3g01570	3	28	13.1	5	90	24.6	5	71	24.6	7	108	31.1	7	109	26.2	6	75	19.7	19754.9	ARATH	Oleosin 5
128	[127]	Q9LF98	FBA8	2	7	8.4	2	2	5.6	2	3	7.5	7	13	28.2	1	2	2	8	17	33	38540.1	ARATH	Fructose-bisphosphate aldolase 8, cytosolic
129	[128]	P21218	PORB	2	4	4.7	1	5	3	1	2	3	9	28	29.9	4	14	8.5	8	17	16.7	43359.6	ARATH	Protochlorophyllide reductase B, chloroplastic
130	[129]	Q9LXG1	RPS9B	5	23	21.2	6	42	24.7	5	36	21.2	10	33	42.9	8	28	34.3	9	33	37.9	23036.6	ARATH	40S ribosomal protein S9-1
131	[130]	P56797	rps2				1	6	3.8	1	5	3.8	8	20	36	2	5	14	5	11	27.5	26904.5	ARATH	30S ribosomal protein S2, chloroplastic
132	[131]	P02647	APOA1	3	8	12.7	5	9	18.4	6	17	18.4				3	6	8.6	1	1	4.5	30778.1	HUMAN	Apolipoprotein A-I
133	[132]	Q94JY7	MRG7.18										8	11	12.7							93053.2	ARATH	Uncharacterized protein At5g18230
134	[133]	Q9LFX8	At1g27090				2	2	6.9				7	13	27.4	3	6	10.2	2	5	7.4	46018.7	ARATH	Glycine-rich protein
135	[134]	P59223	RPS13A	3	12	18.5	6	32	42.4	6	26	37.7	8	46	53.6	6	47	39.1	6	48	39.1	17095.3	ARATH	40S ribosomal protein S13-1
136	[135]	Q9SXE9	At1g62480										6	13	78.9				5	12	65.1	16628.4	ARATH	At1g62480/T3P18_4
137	[136]	Q9T043	RPL14B	1	7	7.5	4	11	28.4	3	10	22.4	6	18	44.8	6	19	44.8	7	23	50.7	15505.5	ARATH	60S ribosomal protein L14-2
138	[137]	Q9FND0	MRH10.6										7	11	22.9	2	2	6	2	3	6.4	50122.7	ARATH	Gb|AAD20086.1
139	[138]	Q0WWY5	At2g43030				5	14	20.3	4	9	15.1	8	16	32.1	7	16	30.3	7	15	25.8	29363.8	ARATH	50S ribosomal protein L3
140	[139]	P02760	AMBP	3	203	9.9	5	191	14.2	6	196	14.2	1	1	3.4	1	6	3.4	1	2	3.4	38999.9	HUMAN	Protein AMBP
141	[140]	Q9SRZ6	CICDH	2	4	5.6							8	12	22.7	2	4	8	5	14	17.3	45746.6	ARATH	Cytosolic isocitrate dehydrogenase [NADP]
142	[141]	O65370	At1g12080										6	14	67.4	2	3	29.7	6	15	67.4	15381.8	ARATH	At1g12080
143	[142]	P02675	FGB	2	22	8.6	2	22	8.6	5	28	23.2				3	13	9.2	2	7	8.6	55928.7	HUMAN	Fibrinogen beta chain
144	[143]	Q96520	PER12										1	1	4.7	7	19	29.1	4	6	19.3	39559.8	ARATH	Peroxidase 12
145	[144]	Q9SAJ4	PGK3	1	3	4.5							7	9	26.2	3	6	12.5	6	12	23.7	42132.1	ARATH	Phosphoglycerate kinase 3, cytosolic
146	[145]	Q93VA8	At1g76010				1	3	3.1				8	22	28.9	3	13	8.3	2	3	12.6	37383	ARATH	Alba DNA/RNA-binding protein
147	[146]	Q5D862	FLG2	1	10	0.5	2	14	1.2	6	25	3.8				1	3	0.5	1	4	0.5	248074.3	HUMAN	Filaggrin-2
148	[147]	Q9STT3	T23J7.130													6	12	22.9				39714.9	ARATH	Aldose 1-epimerase
149	[148]	Q9SB63	MOS1										8	12	7.6							153688.6	ARATH	Protein MODIFIER OF SNC1 1
150	[149]	Q0WW92	At3g44110				2	3	6.2				5	10	16.4	3	7	9	6	13	14.3	46444.7	ARATH	DnaJ protein homolog atj3
151	[150]	Q9LVT8	RGGC										7	13	29.4	2	7	5	3	6	10.9	37999.7	ARATH	RGG repeats nuclear RNA binding protein C
152	[151]	P06702	S100A9				4	13	32.5	6	21	55.3				2	5	24.6	3	6	19.3	13242.1	HUMAN	Protein S100-A9
153	[152]	P42036	RPS14C	1	7	8.7	2	17	16	2	14	16	6	17	44	2	12	16	5	17	37.3	16237.9	ARATH	40S ribosomal protein S14-3
154	[153]	P43286	PIP2-1										4	10	33.1	3	24	22.6	5	11	39.4	30474.5	ARATH	Aquaporin PIP2-1
155	[154]	Q9FMH8	RD21B										7	20	15.3	4	12	7.6	5	16	11.7	51204.4	ARATH	Probable cysteine protease RD21B
156	[155]	Q8LC83	RPS24B				2	9	19.5	2	6	19.5	6	18	31.6	2	8	19.5	5	19	31.6	15419.3	ARATH	40S ribosomal protein S24-2
157	[156]	Q9SFU1	RPL13AA				3	20	18	2	13	12.1	7	26	35.4	4	23	19.9	6	22	29.6	23466.1	ARATH	60S ribosomal protein L13a-1
158	[157]	Q8VZT0	At3g03920				3	15	18.8	3	13	18.8	5	15	31.2	3	9	23.8	3	11	18.8	20982.7	ARATH	Putative H/ACA ribonucleoprotein complex subunit 1-like protein 1
159	[158]	Q4V3D1	HON5										6	11	24				2	2	12.1	51391.8	ARATH	At1g48620
160	[159]	P41127	RPL13B				3	14	13.6	2	9	9.7	6	16	34	3	9	19.4	6	17	34	23767	ARATH	60S ribosomal protein L13-1
161	[160]	Q5T749	KPRP	3	12	3.8	5	10	12.1	6	32	13.6	3	5	8.3	2	5	3.6	3	9	4.7	64136.4	HUMAN	Keratinocyte proline-rich protein
162	[161]	O23255	SAHH1	4	14	7.2							6	13	15.9	5	10	11.8	6	13	18.6	53379	ARATH	Adenosylhomocysteinase 1
163	[162]	O65390	APA1										6	11	16	4	7	9.9	4	8	10.1	54614	ARATH	Aspartic proteinase A1
164	[163]	Q42340	RPS16C				4	20	27.4	4	16	27.4	7	23	39	4	10	27.4	7	18	43.2	16617.6	ARATH	40S ribosomal protein S16-3
165	[164]	Q9FH31	SESA5										6	15	30.3	1	3	6.1	5	10	30.3	18870.9	ARATH	2S seed storage protein 5
166	[165]	P49211	RPL32A				2	9	18.8	2	9	18.8	6	19	35.3	2	6	18.8	3	12	28.6	15503.3	ARATH	60S ribosomal protein L32-1
167	[166]	Q9ZUT9	RPS5A				3	13	15.5	3	13	15.5	7	22	30	4	17	25.1	6	22	25.6	22990.7	ARATH	40S ribosomal protein S5-1
168	[167]	Q9M2E0	RH12										6	11	17.3	1	5	2	4	7	10.6	56775.3	ARATH	DEAD-box ATP-dependent RNA helicase 12
169	[168]	Q9STW6	HSP70-6				1	1	1.1				6	7	10.3				9	11	12.3	76508.6	ARATH	Heat shock 70 kDa protein 6, chloroplastic
170	[169]	P14923	JUP	2	5	2.6	7	26	11.5	7	32	9.1	6	9	7.8	5	8	5.5	5	7	8.9	81745.5	HUMAN	Junction plakoglobin
171	[170]	Q9LTQ5	At3g20370										7	20	18.7	1	3	1.6	5	10	14	43449.5	ARATH	AT3g20370/MQC12_13
172	[171]	P51414	RPL26A				2	11	9.6	3	15	10.3	7	21	37	3	8	17.1	7	21	37	16944.7	ARATH	60S ribosomal protein L26-1
173	[172]	Q9LT39	At3g20820				3	4	8.2	2	3	5.5	8	20	27.1				6	9	18.1	39862.5	ARATH	Leucine-rich repeat (LRR) family protein
174	[173]	Q9SJT9	At2g21390										4	4	3.9	4	7	3.9	8	15	7.8	136468.1	ARATH	Coatomer subunit alpha-2
175	[174]	P42794	RPL11B				3	19	17.6	3	10	17.6	7	16	41.2	3	12	17.6	4	12	29.7	20861.4	ARATH	60S ribosomal protein L11-2
176	[175]	O04379	AGO1										7	9	7.2	3	3	3.2				116191.9	ARATH	Protein argonaute 1
177	[176]	P01868	Ighg1	1	2	3.7	5	15	22.5	3	14	14.2	6	13	24.1	4	17	11.7	5	10	19.1	35704.9	MOUSE	Ig gamma-1 chain C region secreted form
178	[177]	O81822	HSP17.7										6	14	48.7	4	8	23.1	4	13	44.2	17685.5	ARATH	17.7 kDa class II heat shock protein
179	[178]	Q8RVG8	SHD										3	4	4.7				7	9	10	94191.7	ARATH	SHEPHERD
180	[179]	Q9FI56	CLPC1							1	1	1.4	8	8	9.5	3	3	4.1	9	13	11.2	103453.4	ARATH	Chaperone protein ClpC1, chloroplastic
181	[180]	Q93VT9	RPL10A	1	9	5.5	3	27	12.7	3	18	12.7	7	24	20.9	4	18	12.7	4	17	17.7	24917.5	ARATH	60S ribosomal protein L10-1
182	[181]	P41222	PTGDS	3	43	32.6	4	59	36.3	4	102	36.3				2	5	24.2				21029	HUMAN	Prostaglandin-H2 D-isomerase
183	[182]	Q9S7I3	LTP2										2	10	16.1				5	42	46.6	11938.3	ARATH	Non-specific lipid-transfer protein 2
184	[183]	Q9XI01	PDIL1-1										6	9	15.2				6	10	15.4	55602	ARATH	Protein disulfide isomerase-like 1-1
185	[184]	P92549	ATPA										6	9	15.2	2	4	4.1	7	8	17.6	55045.9	ARATH	ATP synthase subunit alpha, mitochondrial
186	[185]	Q9SEI4	RPT3										5	7	19.9	3	4	9.8	3	5	12.3	45751.7	ARATH	26S proteasome regulatory subunit 6B homolog
187	[186]	P21238	CPN60A1										6	6	12.5	1	1	2	7	10	16.6	62072.5	ARATH	Chaperonin 60 subunit alpha 1, chloroplastic
188	[187]	P57751	UGP1										3	3	9.6	1	1	2.6	6	9	16	51920.1	ARATH	UTP--glucose-1-phosphate uridylyltransferase 1
189	[188]	Q93VP3	ELF5A-2										4	9	39.6	2	7	18.2	5	15	40.9	17140.4	ARATH	Eukaryotic translation initiation factor 5A-2
190	[189]	Q9SUR0	At4g23670										3	5	22.5	3	6	22.5	5	12	38.4	17517.9	ARATH	AT4G23670 protein
191	[190]	O82204	RPL28A				2	7	21	2	4	21	6	14	48.3	2	3	21	2	6	21	15895.6	ARATH	60S ribosomal protein L28-1
192	[191]	P02763	ORM1	3	33	25.4	3	32	25.4	5	42	31.3				3	9	25.4	3	4	17.9	23511.8	HUMAN	Alpha-1-acid glycoprotein 1
193	[192]	P93014	rps5				2	4	6.9	2	6	6.9	7	17	22.4	1	1	3	6	14	23.1	32645.4	ARATH	30S ribosomal protein S5, chloroplastic
194	[193]	Q9FPW4	VIP2										5	7	10.9							66234	ARATH	Probable NOT transcription complex subunit VIP2
195	[194]	Q76E23	EIF4G										6	8	4.7							187922.8	ARATH	Eukaryotic translation initiation factor 4G
196	[195]	Q9M8Z8	At3g07010										6	12	16.1	1	2	5	2	3	6.7	46174.6	ARATH	Probable pectate lyase 8
197	[196]	P51413	RPL17B				2	11	10.9	3	12	16	6	26	26.3	2	18	10.9	3	8	16	19853.9	ARATH	60S ribosomal protein L17-2
198	[197]	P49205	RPS17A				2	8	15.6	2	7	15.6	6	13	17	2	5	15.6	3	9	16.3	16046.9	ARATH	40S ribosomal protein S17-1
199	[198]	P31265	TCTP1	1	4	5.4	1	2	5.4	1	3	5.4	4	6	31.5	2	3	10.7	6	13	36.9	18910.5	ARATH	Translationally-controlled tumor protein 1
200	[199]	P49201	RPS23B				4	10	40.1	2	3	26.8	5	9	40.8	3	11	32.4	4	12	40.1	15735.7	ARATH	40S ribosomal protein S23-2
201	[200]	Q9LNJ3	APF2				2	5	4.3	2	2	4.3	6	14	13.8	3	6	8.2	3	9	8.2	52175.7	ARATH	Aspartyl protease family protein 2
202	[201]	Q9FXB5	At1g56660	2	11	3.4	2	18	3.4	2	12	3.4	4	23	8.2	5	13	9.2	5	29	8.6	60749.3	ARATH	F25P12.91 protein
203	[202]	P26587	TIP3-1										5	21	40.7	4	21	38.8	2	13	16.8	28308.2	ARATH	Aquaporin TIP3-1
204	[203]	P25696	ENO2										6	8	21.6				5	9	17.6	47719.7	ARATH	Bifunctional enolase 2/transcriptional activator
205	[204]	P56793	rpl16	1	2	10.4	2	7	10.4	1	7	10.4	4	14	31.9	2	7	21.5	2	8	21.5	15294.2	ARATH	50S ribosomal protein L16, chloroplastic
206	[205]	P42798	RPS15AA				3	11	23.1	2	7	12.3	7	17	56.2	6	36	40.8	7	21	46.2	14804.5	ARATH	40S ribosomal protein S15a-1
207	[206]	A0A178UT81	AXX17_At5g14240										2	2	10.4				5	8	29	28344.7	ARATH	Carbonic anhydrase
208	[207]	Q9LJP2	At3g14220										6	7	20.7				2	2	10.5	40249	ARATH	GDSL esterase/lipase At3g14220
209	[208]	Q949U7	PRXIIE										1	2	7.3				4	8	29.5	24684.5	ARATH	Peroxiredoxin-2E, chloroplastic
210	[209]	A0A178V0W7	AXX17_At4g18920										6	9	17.8	1	1	2.8	3	5	8.4	58897.3	ARATH	Importin subunit alpha
211	[210]	Q570B4	FDH										5	7	11.8				5	7	13.1	61961.7	ARATH	3-ketoacyl-CoA synthase 10
212	[211]	Q42479	CPK3										5	6	14.4	3	4	9.1	5	10	14.4	59336.8	ARATH	Calcium-dependent protein kinase 3
213	[212]	P19366	atpB				1	3	2.8	2	5	4.6	3	5	10.8	2	2	5.4	6	10	18.5	53934.3	ARATH	ATP synthase subunit beta, chloroplastic
214	[213]	Q494N8	At2g25890				2	20	10.7	3	28	17.4	4	23	24.8	3	19	17.4	3	17	17.4	16136.9	ARATH	Oleosin
215	[214]	P48491	CTIMC	1	3	5.1							3	5	15	1	2	5.1	5	12	26.4	27169.3	ARATH	Triosephosphate isomerase, cytosolic
216	[215]	P51420	RPL31C										4	8	32.8				2	6	25.2	13803.2	ARATH	60S ribosomal protein L31-3
217	[216]	P25873	RPL15										6	15	23.8	1	3	5.4	5	12	18.8	29707.5	ARATH	50S ribosomal protein L15, chloroplastic
218	[217]	P59232	RPS27AB				3	17	14.6	4	23	20.4	6	26	30.6	2	6	15.9	5	19	30.6	17811.9	ARATH	Ubiquitin-40S ribosomal protein S27a-2
219	[218]	P0C0L4	C4A	4	12	6	2	9	2.5	1	5	1.1				2	5	2.5	1	1	1.4	192787.1	HUMAN	Complement C4-A
220	[219]	Q9C514	RPS7A				3	6	29.3				6	10	44.5	2	5	25.1	5	13	39.8	21922.6	ARATH	40S ribosomal protein S7-1
221	[220]	A0A178VUN1	AXX17_At2g13900				1	5	1.3	1	4	1.3	5	10	8.4	4	9	6	4	6	7.5	85235.6	ARATH	Uncharacterized protein
222	[221]	Q940B0	RPL18C	1	1	5.3	3	12	18.2	3	12	16	6	18	32.1	3	15	16	6	23	32.1	20966.9	ARATH	60S ribosomal protein L18-3
223	[222]	O65202	ACX1	2	7	3.2							6	7	10.4	3	4	4.2	2	5	3.2	74302.7	ARATH	Peroxisomal acyl-coenzyme A oxidase 1
224	[223]	Q8GYN9	MENB										7	9	22.6	1	1	3.9	1	1	2.7	37056.5	ARATH	1,4-dihydroxy-2-naphthoyl-CoA synthase, peroxisomal
225	[224]	Q39258	VHA-E1										7	9	27.4	1	2	6.5	4	5	13.5	26060.2	ARATH	V-type proton ATPase subunit E1
226	[225]	A0A178VLG4	AXX17_At3g12510										5	10	35.3	1	1	11.9	2	3	22.9	22477.6	ARATH	Cysteine proteinase inhibitor
227	[226]	Q41931	ACO2										4	4	14.4				4	13	19.1	36183.3	ARATH	1-aminocyclopropane-1-carboxylate oxidase 2
228	[227]	Q8L5Z5	At2g05380				2	5	25.9	1	2	7.8	3	38	25.9	2	24	25.9	3	24	45.7	11584.9	ARATH	Uncharacterized protein At2g05380
229	[228]	P31151	S100A7				1	1	18.8	4	11	52.5				2	3	29.7	2	4	29.7	11471.1	HUMAN	Protein S100-A7
230	[229]	Q8RWV0	TKL-1	1	1	2							4	6	7.3	2	2	3.8	4	10	7.3	79969	ARATH	Transketolase-1, chloroplastic
231	[230]	O65282	CPN20										3	4	18.6				4	13	24.9	26802.1	ARATH	20 kDa chaperonin, chloroplastic
232	[231]	Q94AZ4	CML13										7	9	42.6	1	2	7.4	1	2	4.7	16516.9	ARATH	Probable calcium-binding protein CML13
233	[232]	P49200	RPS20A				4	11	34.7	3	8	29	5	18	34.7	3	6	25	4	12	25	13878.4	ARATH	40S ribosomal protein S20-1
234	[233]	A0A178WE72	AXX17_At1g25550										6	7	5.6				2	2	2.1	166232.6	ARATH	Uncharacterized protein
235	[234]	Q9SSS7	At1g52730										5	5	16.3							37754.5	ARATH	AT1G52730 protein
236	[235]	Q9LP53	At1g29250				3	7	29.2	3	3	29.2	5	14	35.4	1	2	9.2	2	4	23.8	14573.8	ARATH	Alba DNA/RNA-binding protein
237	[236]	Q9LSB4	NAI2										1	1	3.1				5	6	7.9	85017	ARATH	TSA1-like protein
238	[237]	Q0WWL8	At4g37870	1	6	1.8							5	7	10.1	2	5	4	4	6	10.1	73405.7	ARATH	Phosphoenolpyruvate carboxykinase (ATP)-like protein
239	[238]	Q9ZP06	At1g53240										2	2	8.8				5	7	20.5	35804.8	ARATH	Malate dehydrogenase 1, mitochondrial
240	[239]	Q8W0Z9	CCR4-1										5	8	11.5	3	6	6.5	1	3	1.7	66761.9	ARATH	Carbon catabolite repressor protein 4 homolog 1
241	[240]	Q8RXX5	At5g47190										4	10	31	3	5	23.6	3	9	24.5	25468.7	ARATH	50S ribosomal protein L19-2, chloroplastic
242	[241]	Q8W555	At3g07810										5	7	12.1				2	2	5.9	51871.9	ARATH	AT3g07810/F17A17_15
243	[242]	Q9M2Y6	CGR2										4	7	23.4							28532.2	ARATH	Probable pectin methylesterase CGR2
244	[243]	P01011	SERPINA3	1	1	4.7	3	4	13.7	4	9	18.4				1	1	4.7	1	1	4.7	47651.3	HUMAN	Alpha-1-antichymotrypsin
245	[244]	Q9SKU1	At2g20760										5	7	16.9	5	12	16.9	5	15	16.9	37225.3	ARATH	Clathrin light chain 1
246	[245]	Q93VC7	RPS1										3	3	6.7				5	5	17.8	45110.8	ARATH	30S ribosomal protein S1, chloroplastic
247	[246]	Q9FKT7	MDA7.16										6	16	32.7	5	8	28				15723.4	ARATH	Glycine-rich protein / oleosin
248	[247]	Q0WRH6	At5g27770	1	6	9.7	3	13	31.5	3	13	29	5	15	46	3	7	25	4	22	36.3	14047.2	ARATH	60S ribosomal protein L22-like
249	[248]	Q8LPS1	LACS6										5	6	9	3	7	6.4	3	4	6.1	76604.1	ARATH	Long chain acyl-CoA synthetase 6, peroxisomal
250	[249]	P05786	KRT8	1	15	1.9	4	89	7.5	5	122	7.5	4	13	7.5	1	6	1.9	4	26	7.5	53627.7	BOVIN	Keratin, type II cytoskeletal 8
251	[250]	Q93YR0	At1g41830													4	16	8.9	1	2	2.4	60579	ARATH	Uncharacterized protein At1g41830
252	[251]	P25311	AZGP1	3	4	16.4	2	7	11.1	4	12	19.8										34259	HUMAN	Zinc-alpha-2-glycoprotein
253	[252]	P31414	AVP1										4	6	7	4	9	7.9	3	5	5.2	80820.7	ARATH	Pyrophosphate-energized vacuolar membrane proton pump 1
254	[253]	Q1H5F7		1	7	6.2	4	19	29	4	32	26.9	5	11	37.2	1	4	6.2	3	7	24.1	15732.6	ARATH	Histone H2B
255	[254]	Q9FJP3	RPL29				1	2	6.4	2	9	15	4	7	23.1	3	7	22.5	3	6	22.5	19377.6	ARATH	50S ribosomal protein L29, chloroplastic
256	[255]	Q9SRT9	RGP1										6	7	18.2				4	6	16.2	40629.4	ARATH	UDP-arabinopyranose mutase 1
257	[256]	O04005	PER1										4	7	29.2				3	6	24.5	24081.7	ARATH	1-Cys peroxiredoxin PER1
258	[257]	P01834	IGKC	4	37	48.6	3	22	48.6	3	40	48.6				1	2	13.1				11765.1	HUMAN	Immunoglobulin kappa constant
259	[258]	Q9SJB9	At2g04520										1	1	6.9	4	7	35.9	4	9	35.9	16637.8	ARATH	Nucleic acid-binding, OB-fold-like protein
260	[259]	P25855	GDH1																3	8	27.3	17947.4	ARATH	Glycine cleavage system H protein 1, mitochondrial
261	[260]	Q9FVT2	At1g57720										3	6	10.4				5	10	16.7	46400.8	ARATH	Probable elongation factor 1-gamma 2
262	[261]	Q67XR9	UP9										3	6	10.3							49920.1	ARATH	At1g29120
263	[262]	Q08554	DSC1	1	3	1.7	3	3	4.4	4	15	5.8	1	1	1.7	1	2	1.7	1	2	1.7	99987.7	HUMAN	Desmocollin-1
264	[263]	O22791	At2g33410										4	8	13.9	1	2	4	2	3	7.9	41328.8	ARATH	Putative RNA-binding protein
265	[264]	Q84WH6	At1g58270										4	7	15.9	2	3	7.6	5	8	18.3	33205.3	ARATH	Expressed protein
266	[265]	Q0WUX6	At2g42790										4	7	9	4	6	11.4	4	8	10.6	56175.7	ARATH	Citrate synthase
267	[266]	Q96329	ACX4										4	8	12.4	2	3	5	4	7	12.4	47557.3	ARATH	Acyl-coenzyme A oxidase 4, peroxisomal
268	[267]	P02766	TTR	1	2	8.8	2	16	27.9	3	28	43.5				1	3	19	1	3	19	15887.2	HUMAN	Transthyretin
269	[268]	Q9SIF2	HSP90-5										2	2	3.6	2	2	3.6	5	5	7.2	88663.7	ARATH	Heat shock protein 90-5, chloroplastic
270	[269]	Q93ZC2	At5g36230													2	2	6.8	4	6	11.9	47215.6	ARATH	ARM repeat superfamily protein
271	[270]	O81629	KLCR1										3	3	4.8	2	3	3.8	4	6	11.5	66281.1	ARATH	Protein KINESIN LIGHT CHAIN-RELATED 1
272	[271]	Q9LEY9	At5g08180				1	2	6.4	1	2	6.4	3	5	14.7	2	5	13.5	4	11	37.2	16948.3	ARATH	H/ACA ribonucleoprotein complex subunit 2-like protein
273	[272]	Q9LKA5	MORF8										4	8	14.9				3	4	11.6	42870.1	ARATH	Multiple organellar RNA editing factor 8, chloroplastic/mitochondrial
274	[273]	Q93Y22	At5g05010										4	5	11.8				2	2	5.5	57719.4	ARATH	Coatomer subunit delta
275	[274]	Q9SGA6	RPS19A	1	3	7.7	3	5	23.1	2	2	13.3	5	14	40.6	3	10	23.1	4	14	28.7	15828.3	ARATH	40S ribosomal protein S19-1
276	[275]	Q9SND1	F11C1_210										8	10	4.4							235662.4	ARATH	Uncharacterized protein F11C1_210
277	[276]	Q38896	CSP4										3	9	18.4	2	6	15.4	2	6	11.4	19077.4	ARATH	Cold shock domain-containing protein 4
278	[277]	Q9STE8	TOC75-3										2	2	3.5	2	2	3.5	5	6	9.3	89189.5	ARATH	Protein TOC75-3, chloroplastic
279	[278]	Q0WW26	At4g34450										2	2	2.7	4	6	7.7	4	6	8.7	98491.5	ARATH	Coatomer subunit gamma
280	[279]	Q8H168	At5g11420										4	5	13.4				3	3	10.4	39612.9	ARATH	Uncharacterized protein At5g11420
281	[280]	P56791	rpl2-A	1	4	6.2	2	10	12.4	1	4	6.2	3	9	16.1	3	8	16.1	3	8	16.1	29864.9	ARATH	50S ribosomal protein L2, chloroplastic
282	[281]	Q9SYM5	RHM1										1	1	1.6				5	7	9.6	75372.5	ARATH	Trifunctional UDP-glucose 4,6-dehydratase/UDP-4-keto-6-deoxy-D-glucose 3,5-epimerase/UDP-4-keto-L-rhamnose-reductase RHM1
283	[282]	Q39048	CER2										2	2	6.9	4	8	10.9	4	7	14.5	47238.5	ARATH	Protein ECERIFERUM 2
284	[283]	Q0WWC2	At5g01600										1	2	3.5				3	6	20	28178.2	ARATH	Ferritin
285	[284]	Q9SSB5	RPT1A										4	5	11.5	4	7	10.6	1	1	3.1	47803.7	ARATH	26S proteasome regulatory subunit 7 homolog A
286	[285]	Q9FGX1	ACLB-2	1	4	2.5							3	3	7.1	2	3	4.1	4	5	8.7	65828.3	ARATH	ATP-citrate synthase beta chain protein 2
287	[286]	P16181	RPS11A	1	6	6.2	3	18	20	2	13	13.8	4	15	20.6	2	8	13.8	4	16	20.6	17957.2	ARATH	40S ribosomal protein S11-1
288	[287]	Q9SF53	RPL35A				2	11	12.2	3	18	17.9	6	16	35	3	11	19.5	5	14	26	14285.3	ARATH	60S ribosomal protein L35-1
289	[288]	Q9FK91	PARP3										4	5	6.9	2	2	3.2	4	5	7.1	91406.7	ARATH	Protein ADP-ribosyltransferase PARP3
290	[289]	Q9M042	At5g01300																3	7	27.2	17823.5	ARATH	PEBP (Phosphatidylethanolamine-binding protein) family protein
291	[290]	P07355	ANXA2	2	4	6.2	1	6	2.9	4	16	13.9				2	2	8.3	1	1	2.9	38604.4	HUMAN	Annexin A2
292	[291]	Q8VZB9	RPL10AA										2	3	7.9	1	3	3.7	4	11	18.5	24469.2	ARATH	60S ribosomal protein L10a-1
293	[292]	O82514	ADK1										2	2	14.2				4	6	24.8	26932.2	ARATH	Adenylate kinase 4
294	[293]	Q8VWF5	ML5										4	4	9.9							88213.3	ARATH	Protein MEI2-like 5
295	[294]	Q9FVQ1	NUCL1										5	8	8.4	3	5	5	4	5	6.8	58773.8	ARATH	Nucleolin 1
296	[295]	P34066	PAF1										3	5	21.2	1	1	9.4	2	3	11.9	30476.3	ARATH	Proteasome subunit alpha type-1-A
297	[296]	Q9FLT0	TSN2										3	3	3.6	2	2	2.2	6	7	6.7	107743.2	ARATH	Ribonuclease TUDOR 2
298	[297]	P51418	RPL18AB				4	17	21.9	4	14	21.9	5	15	25.3	2	4	13.5	4	13	21.9	21307.3	ARATH	60S ribosomal protein L18a-2
299	[298]	Q3EDG6	At1g07985							1	1	7.6	4	8	20.8	1	2	9				16460.9	ARATH	Expressed protein
300	[299]	P56799	rps4				2	5	9	2	4	9	3	9	24.9	1	4	4	2	8	19.9	23240.3	ARATH	30S ribosomal protein S4, chloroplastic
301	[300]	A0A1P8AVE7	At1g62290										4	5	12.1	1	1	3.2	2	3	5.6	50337.7	ARATH	Saposin-like aspartyl protease family protein
302	[301]	Q9C658	DCP5										4	8	9.8	1	1	3.6	3	5	8	64370.6	ARATH	Protein decapping 5
303	[302]	O80837	DBP										3	6	18.4	1	1	4.7				20968.3	ARATH	Remorin
304	[303]	P31168	COR47																4	5	35.1	29897	ARATH	Dehydrin COR47
305	[304]	Q8LEI7											4	6	12.4	2	2	6.8	2	4	7.2	49399.6	ARATH	Ras-GTPase-activating protein SH3-domain binding protein-like
306	[305]	Q9LSK7	HON4										3	3	19							51524.9	ARATH	At3g18035
307	[306]	O23252	EIF4E1										3	4	21.7							26519.6	ARATH	Eukaryotic translation initiation factor 4E-1
308	[307]	Q9LKA4	UBA2C										3	4	9.4				1	1	2.2	41780.3	ARATH	UBP1-associated protein 2C
309	[308]	P56801	rps8										4	11	25.4	2	3	17.2	3	9	19.4	15479.3	ARATH	30S ribosomal protein S8, chloroplastic
310	[309]	P02750	LRG1	1	1	11.2	3	9	11.2	3	4	11.2										38178.2	HUMAN	Leucine-rich alpha-2-glycoprotein
311	[310]	Q9LSY7	PER30													4	6	9.1				35788.5	ARATH	Peroxidase 30
312	[311]	Q9SRX2	RPL19A										3	4	20.1				3	5	23.8	24606.5	ARATH	60S ribosomal protein L19-1
313	[312]	A0A178UPS1	AXX17_At5g03490										1	1	6.3	3	6	16.4	3	6	17.2	26474	ARATH	Uncharacterized protein
314	[313]	Q8VZD4	DEG15										5	6	7.9				1	1	1.4	76126.3	ARATH	Glyoxysomal processing protease, glyoxysomal
315	[314]	P30186	PAD1										2	2	7.2	3	3	17.2	1	1	7.2	27337.4	ARATH	Proteasome subunit alpha type-7-A
316	[315]	Q9LTF2	RPS10C										3	6	27.4	1	1	11.7	2	4	15.6	19551.3	ARATH	40S ribosomal protein S10-3
317	[316]	O04151	CRT1																6	6	24.5	48527.7	ARATH	Calreticulin-1
318	[317]	O23515	RPL15A				1	2	6.9				6	8	33.8	1	3	3.4	5	6	22.1	24239.2	ARATH	60S ribosomal protein L15-1
319	[318]	Q9S7Z3	PCS1										3	4	10.1	2	2	4.3	2	2	6.8	54475.1	ARATH	Glutathione gamma-glutamylcysteinyltransferase 1
320	[319]	O23029	At1g04560										3	7	28.5	1	1	14.5				19846.3	ARATH	AWPM-19-like family protein
321	[320]	Q94AF6	At5g20160				2	5	29.7	1	4	7.8	3	5	48.4	2	4	25.8	3	6	33.6	13897.3	ARATH	AT5g20160/F5O24_50
322	[321]	Q8RX56	PATROL1																4	4	5.7	124524.1	ARATH	Protein unc-13 homolog
323	[322]	O23254	SHM4										3	5	8.3				2	2	8.7	51718.4	ARATH	Serine hydroxymethyltransferase 4
324	[323]	Q9FPF0	DJ1A										1	1	3.3	1	2	3.3	3	5	15.3	41857.7	ARATH	Protein DJ-1 homolog A
325	[324]	B9DFK9	At4g00660										3	5	12.8							42793.1	ARATH	AT4G00660 protein (Fragment)
326	[325]	O80725	ABCB4										1	1	1.3	2	3	2.6	2	3	2.6	139029.1	ARATH	ABC transporter B family member 4
327	[326]	P34790	CYP18-3										4	8	26.7	1	2	4.7	2	5	12.8	18373	ARATH	Peptidyl-prolyl cis-trans isomerase CYP18-3
328	[327]	Q9FT52	At3g52300										2	2	14.3				5	6	32.7	19586.2	ARATH	ATP synthase subunit d, mitochondrial
329	[328]	P59259	At1g07660										4	8	42.7	1	2	9.7	2	4	21.4	11409.5	ARATH	Histone H4
330	[329]	Q9FM47	MNF13.1										4	4	17.3							42408.1	ARATH	RNA-binding (RRM/RBD/RNP motifs) family protein
331	[330]	A0A178VGE8	AXX17_At3g17290				1	10	6.5	1	7	6.5	2	29	12.1	2	24	12.1	2	8	12.1	23201.2	ARATH	PBPII
332	[331]	Q0WSS0	At1g57860				2	26	9.8	2	19	9.8	5	22	31.1	3	19	13.4	4	20	14	18709	ARATH	Uncharacterized protein At1g57860
333	[332]	Q9FGY1	BXL1										4	6	6.1	2	2	3.7	2	2	3.5	83524.3	ARATH	Beta-D-xylosidase 1
334	[333]	Q6NQ72	ALY4										3	5	14.6	2	3	8.7	3	4	14.6	30435.4	ARATH	THO complex subunit 4D
335	[334]	P0DH91	ARF2-B	1	1	4.4							3	7	20.4	2	3	12.7	2	5	12.7	20592.8	ARATH	ADP-ribosylation factor 2-B
336	[335]	O48963	PHOT1										3	5	3.9	2	3	2.7	3	4	4	111689.7	ARATH	Phototropin-1
337	[336]	P46422	GSTF2	2	3	10.8							2	3	10.8	2	5	10.8	3	6	16.5	24128.8	ARATH	Glutathione S-transferase F2
338	[337]	O04499	PGM1													1	1	3.9	3	4	7.9	60580.1	ARATH	2,3-bisphosphoglycerate-independent phosphoglycerate mutase 1
339	[338]	Q9S7E4	FDH1										3	4	13.5	1	1	7	3	4	14.6	42410	ARATH	Formate dehydrogenase, chloroplastic/mitochondrial
340	[339]	P31944	CASP14	1	1	4.5	3	12	14	3	14	14	2	3	8.7	3	4	13.2	3	4	14.5	27679.8	HUMAN	Caspase-14
341	[340]	P41916	RAN1										4	8	17.6	2	4	11.8	3	8	15.4	25276	ARATH	GTP-binding nuclear protein Ran-1
342	[341]	Q94EH8	ALY3										3	4	14.2				3	3	15.6	31318.5	ARATH	THO complex subunit 4C
343	[342]	Q9FE06	EXL2										4	6	12.1				1	1	3.6	32674.8	ARATH	Protein EXORDIUM-like 2
344	[343]	Q93Y35	RPN7										4	4	12.1	2	3	5.7	1	1	3.6	44282.5	ARATH	26S proteasome non-ATPase regulatory subunit 6 homolog
345	[344]	P05109	S100A8	1	5	11.8	3	12	31.2	3	14	31.2				2	6	19.4	4	8	38.7	10834.6	HUMAN	Protein S100-A8
346	[345]	P35510	PAL1	3	10	5.9													1	1	2.1	78726.4	ARATH	Phenylalanine ammonia-lyase 1
347	[346]	P56792	rpl14										2	4	21.3	2	6	21.3	2	4	21.3	13581.9	ARATH	50S ribosomal protein L14, chloroplastic
348	[347]	P81605	DCD	3	32	22.7	1	5	10	2	20	20	2	9	20	2	5	20	2	10	20	11284	HUMAN	Dermcidin
349	[348]	P42761	GSTF10										2	2	10.7	2	3	8.8	4	8	21.4	24230.2	ARATH	Glutathione S-transferase F10
350	[349]	Q8LPR9	TIC110										4	4	4.7				3	3	3.6	112121.5	ARATH	Protein TIC110, chloroplastic
351	[350]	P25856	GAPA1				1	6	3.8	3	22	8.3							3	3	9.6	42489.9	ARATH	Glyceraldehyde-3-phosphate dehydrogenase GAPA1, chloroplastic
352	[351]	Q945Q1	CYS1										3	6	40.6	1	2	13.9	1	2	13.9	11255.6	ARATH	Cysteine proteinase inhibitor 1
353	[352]	O65686	RPS16-1										3	6	25.7	1	3	13.3	1	2	13.3	12698.9	ARATH	30S ribosomal protein S16-1, chloroplastic
354	[353]	O22941	PXM16										4	5	5.1	1	1	1.2	3	3	3.7	110996	ARATH	Insulin-degrading enzyme-like 1, peroxisomal
355	[354]	C0Z2U2	At4g39260										3	8	70.6				2	4	56.9	5884.5	ARATH	AT4G39260 protein
356	[355]	Q9ZVL0	T22H22.25										3	5	16.5				2	3	11	21569.1	ARATH	Glycoprotein membrane GPI-anchored
357	[356]	Q208N7	ACD32.1										3	3	14	1	1	4.6	2	3	9.1	31222.5	ARATH	Alpha-crystallin domain 32.1
358	[357]	O04209	CLC2													2	4	8.9	3	7	14.7	28837.2	ARATH	Clathrin light chain 2
359	[358]	O64843	CID7										3	3	6.7							62147.5	ARATH	Polyadenylate-binding protein-interacting protein 7
360	[359]	Q8LC74											1	1	4.8	2	3	7.4	3	5	12.1	31041.7	ARATH	Vegetative storage protein-like
361	[360]	Q39085	DIM										5	5	9.6	2	3	4.3	4	6	8.2	65394.8	ARATH	Delta(24)-sterol reductase
362	[361]	Q0WW10	At4g11420										4	4	5.5	2	2	3.3	2	3	2.8	114300.5	ARATH	Eukaryotic translation initiation factor 3 subunit A
363	[362]	Q8W569	At4g26650										3	4	8.1	1	1	3.1	1	2	3.1	49397.3	ARATH	AT4g26650/T15N24_100
364	[363]	Q0WVM5	At1g63810																6	6	6.4	120151.3	ARATH	Nucleolar protein
365	[364]	Q8L611	SEC31B										5	5	7.5	1	1	1.2	3	4	4.5	119875.9	ARATH	Protein transport protein SEC31 homolog B
366	[365]	Q9FIX1	AIG2LB										2	3	14	1	1	8.7	3	5	23.3	20017.7	ARATH	AIG2-like protein B
367	[366]	Q9SRH6	HIR3										4	5	15.1	4	4	11.6	3	5	9.5	31321.3	ARATH	Hypersensitive-induced response protein 3
368	[367]	Q9FNM7	RH26										4	4	6.7							94186.8	ARATH	DEAD-box ATP-dependent RNA helicase 26
369	[368]	Q9SJU4	FBA1				2	9	5.3	3	14	9							1	1	3.8	42931.3	ARATH	Fructose-bisphosphate aldolase 1, chloroplastic
370	[369]	Q9ZRW8	GSTU19										3	4	12.3				4	7	16.9	25650.8	ARATH	Glutathione S-transferase U19
371	[370]	Q9FMU6	MPT3										5	7	12.8				2	2	4.5	40089.9	ARATH	Mitochondrial phosphate carrier protein 3, mitochondrial
372	[371]	Q94AL3	SDRd										4	4	16.8							30204.2	ARATH	NAD(P)-binding Rossmann-fold superfamily protein
373	[372]	Q9LYP6	ATS3										2	4	15.5	1	2	6.6	2	5	15.5	23083.5	ARATH	Embryo-specific protein ATS3
374	[373]	O80998	JAL20										4	5	12.9	2	3	8.2	3	5	11.1	48979.2	ARATH	Jacalin-related lectin 20
375	[374]	Q9LYK8	MSD2										1	2	10				3	4	19.5	26891.9	ARATH	Superoxide dismutase [Mn] 2, mitochondrial
376	[375]	Q9FWR4	DHAR1										2	2	13.1				4	4	25.4	23641.2	ARATH	Glutathione S-transferase DHAR1, mitochondrial
377	[376]	P11574	VHA-B1										4	6	9.7				1	1	3.1	54108	ARATH	V-type proton ATPase subunit B1
378	[377]	P61841	rps7-A										2	4	18.1	2	4	12.3	3	7	23.9	17357.4	ARATH	30S ribosomal protein S7, chloroplastic
379	[378]	Q96261	LEA										1	1	13				2	5	13	19298.1	ARATH	Probable dehydrin LEA
380	[379]	Q9M385	RPL17										3	5	10				2	2	8.1	23481.6	ARATH	50S ribosomal protein L17, chloroplastic
381	[380]	O48802	CLMP1										4	5	6.5				2	2	3.5	82708.8	ARATH	Protein CLMP1
382	[381]	Q8GWY0	SCI1										2	2	13.2				2	3	16.4	19087.4	ARATH	Style cell-cycle inhibitor 1
383	[382]	Q9SE60	MTHFR1										4	4	8.3	3	3	6.1	3	4	6.1	66289	ARATH	Methylenetetrahydrofolate reductase 1
384	[383]	Q42564	APX3										4	6	13.6	2	3	7.3	2	3	7.3	31572.1	ARATH	L-ascorbate peroxidase 3
385	[384]	Q56XH1	At4g24795													1	1	2	3	3	5.7	77378.4	ARATH	Uncharacterized protein At4g24795
386	[385]	Q9LIA8	UGD2																3	6	7.9	53173.6	ARATH	UDP-glucose 6-dehydrogenase 2
387	[386]	Q9LHP2	SCL30A										3	5	14.9							30226.8	ARATH	Serine/arginine-rich SC35-like splicing factor SCL30A
388	[387]	Q43349	CP29A										3	4	10.5				2	14	9.6	36007.6	ARATH	29 kDa ribonucleoprotein, chloroplastic
389	[388]	Q9LZ57	RPL36C							1	9	9.3	3	7	27.8	2	10	16.7	3	11	18.5	12189.6	ARATH	60S ribosomal protein L36-3
390	[389]	Q9M2D8	At3g61260										3	5	25.9				3	5	25.9	23144.5	ARATH	Uncharacterized protein At3g61260
391	[390]	P54888	P5CSB										2	2	3.4	3	4	5	4	5	6.9	78872	ARATH	Delta-1-pyrroline-5-carboxylate synthase B
392	[391]	Q8RX87	RFS6																4	5	5.5	83117.2	ARATH	Probable galactinol--sucrose galactosyltransferase 6
393	[392]	P01837	Igkc				2	35	20.6	2	28	20.6	2	9	20.6	1	16	7.5	2	17	20.6	11934.2	MOUSE	Immunoglobulin kappa constant
394	[393]	Q42112	RPP0B	1	2	4.1							2	3	7.5	1	1	4.1	3	4	16.2	34133.4	ARATH	60S acidic ribosomal protein P0-2
395	[394]	Q84W82																	4	5	17.1	32560.2	ARATH	At3g17520
396	[395]	Q42252											2	2	38.3				1	2	13	13468.3	ARATH	Beta-glucosidase homologue (Fragment)
397	[396]	Q8LFE1											2	2	9.3	1	1	4.6	2	2	9.3	57509.8	ARATH	Pyruvate kinase
398	[397]	Q9LTT8	VCS										3	3	3.1	3	3	2.8	3	4	3.1	145721.7	ARATH	Enhancer of mRNA-decapping protein 4
399	[398]	Q0WW72	At3g53430							1	1	9	3	6	26.5				2	3	18.7	17970	ARATH	60S ribosomal Protein L12-like
400	[399]	Q93ZK4											3	4	23.6	1	1	11.5	1	1	6.8	16471.4	ARATH	AT3g26420/F20C19_14
401	[400]	Q9FMM3	MBD2.15										3	4	2.3							187620.2	ARATH	GYF domain-containing protein
402	[401]	Q9S814	EIN2										3	4	3.6							140957.7	ARATH	Ethylene-insensitive protein 2
403	[402]	Q9LYG3	NADP-ME2	1	3	2.9							2	2	4.8				4	4	9.7	64413.3	ARATH	NADP-dependent malic enzyme 2
404	[403]	Q9FMQ0	MXC9.8										4	4	8.4							67884.9	ARATH	AT5g12120/MXC9_8
405	[404]	Q41963	TIP1-2										1	2	9.9	1	2	9.9	2	6	17	25849	ARATH	Aquaporin TIP1-2
406	[405]	Q93XX8	At2g20490				2	18	43.8	1	10	23.4	2	7	43.8				2	7	43.8	7391.6	ARATH	H/ACA ribonucleoprotein complex subunit 3-like protein
407	[406]	Q9XEE2	ANN2										3	3	12.9				2	4	8.2	36266.5	ARATH	Annexin D2
408	[407]	P93306	NAD7										4	5	12.2	1	1	3				44962.3	ARATH	NADH dehydrogenase [ubiquinone] iron-sulfur protein 2
409	[408]	C0Z3F0	At3g16420				1	8	17	1	5	17	2	11	27.7	2	13	27.7	1	9	17	10159.8	ARATH	AT3G16420 protein
410	[409]	Q9SK09	At2g28490										3	6	5.5	3	15	4.9	1	3	1.2	55705.6	ARATH	Vicilin-like seed storage protein At2g28490
411	[410]	P56798	rps3										3	5	18.3	3	7	17.9	2	2	8.7	25188.7	ARATH	30S ribosomal protein S3, chloroplastic
412	[411]	Q43729	PER57										2	3	8.6							34098.4	ARATH	Peroxidase 57
413	[412]	Q9M0Y8	NSF													2	3	3	3	5	4.6	81487.9	ARATH	Vesicle-fusing ATPase
414	[413]	Q9M892	At3g02480																2	3	48.5	7145	ARATH	AT3g02480/F16B3_11
415	[414]	P24100	CDKA-1										1	1	4.8				3	4	16.3	34030.6	ARATH	Cyclin-dependent kinase A-1
416	[415]	Q0WWN5	At4g10480													2	2	13.7	2	3	15.6	23171.9	ARATH	Putative alpha NAC
417	[416]	Q8VZT4	At1g29370										3	4	6							90888.9	ARATH	RNA polymerase II degradation factor-like protein (DUF1296)
418	[417]	P49206	RPS26A				2	12	18.3	2	14	18.3	2	15	18.3	2	10	18.3	2	13	18.3	14729.2	ARATH	40S ribosomal protein S26-1
419	[418]	Q9FNE2	GRXC2																2	2	34.2	11756.5	ARATH	Glutaredoxin-C2
420	[419]	Q56ZW2	At3g09820										1	2	10.1				2	3	18.4	19759.8	ARATH	Adenosine kinase like protein (Fragment)
421	[420]	Q9LT78	RD21C										2	3	7.1				1	2	3.5	49308.1	ARATH	Probable cysteine protease RD21C
422	[421]	Q94BT5											3	4	29.9				2	3	17.5	19741.8	ARATH	At2g47730/F17A22.12
423	[422]	Q9SKX2	PME16										2	3	5.4							56589.1	ARATH	Probable pectinesterase/pectinesterase inhibitor 16
424	[423]	P10896	RCA							1	2	1.5	2	3	8.4				2	3	6.3	51981.7	ARATH	Ribulose bisphosphate carboxylase/oxygenase activase, chloroplastic
425	[424]	Q56W20	At2g04170										2	5	13	1	4	5.8	2	6	13	23456.5	ARATH	Uncharacterized protein At2g04170 (Fragment)
426	[425]	Q05431	APX1													1	6	4.4	2	3	16.8	27561.5	ARATH	L-ascorbate peroxidase 1, cytosolic
427	[426]	Q9SIK2	RPS25B				2	2	19.4	2	5	19.4	2	7	19.4	1	4	6.5	1	5	6.5	12069.3	ARATH	40S ribosomal protein S25-2
428	[427]	Q8GX27	At3g19920/MPN9_16										3	3	12							45235	ARATH	At3g19920
429	[428]	P0CZ23	ACX3										2	2	3.4	1	2	1.9	4	4	6.4	75677	ARATH	Acyl-coenzyme A oxidase 3, peroxisomal
430	[429]	P48349	GRF6													1	1	7.7	2	2	13.7	27975.9	ARATH	14-3-3-like protein GF14 lambda
431	[430]	P39207	NDK1	1	4	10.7	1	1	10.7				2	4	19.5	1	2	10.7	2	6	16.1	16500.1	ARATH	Nucleoside diphosphate kinase 1
432	[431]	Q8W4I3	At4g38550/F20M13.110										3	5	7.4				2	3	5.4	69655.6	ARATH	Phospholipase like protein
433	[432]	Q9M2U2	ECR										2	4	9.7	2	2	9.7	1	1	3.2	35723.9	ARATH	Very-long-chain enoyl-CoA reductase
434	[433]	Q9C9C0	SPPA										2	2	3.8							75095.2	ARATH	Serine protease SPPA, chloroplastic
435	[434]	A0A178UVB6	AXX17_At4g44660				1	7	9.1	1	6	9.1	2	4	27.3	2	3	27.3	2	5	27.3	9869.2	ARATH	GRP8
436	[435]	O23044	PER3													2	8	8				34906	ARATH	Peroxidase 3
437	[436]	P92947	MDAR5																3	4	9.7	53302.3	ARATH	Monodehydroascorbate reductase, chloroplastic/mitochondrial
438	[437]	Q39255	SKP1A										2	4	16.9	2	4	14.4				17857.3	ARATH	SKP1-like protein 1A
439	[438]	B0LYL3	BGL1										3	15	8.3							11907.7	ARATH	Beta-glucosidase 1 (Fragment)
440	[439]	O64650	RPS27A										2	7	31	2	6	31	2	2	31	9405.2	ARATH	40S ribosomal protein S27-1
441	[440]	Q42004											2	3	20.3				1	1	20.3	7742.8	ARATH	Uncharacterized protein (Fragment)
442	[441]	Q9CAV6	WNK1										1	1	1.3	4	4	5.4	4	5	7.6	80208.2	ARATH	Serine/threonine-protein kinase WNK1
443	[442]	Q9ZPZ4	At1g09310										3	3	15.6				4	8	22.9	19947.2	ARATH	T31J12.3 protein
444	[443]	Q9S7C0	HSP70-14	1	1	1.6							2	4	1.7	2	3	1.7	3	3	5.4	91750.9	ARATH	Heat shock 70 kDa protein 14
445	[444]	Q94JX5	WLIM1										3	3	16.3	2	6	11.6	2	5	11.6	21040.3	ARATH	LIM domain-containing protein WLIM1
446	[445]	P34791	CYP20-3										1	1	4.6				4	9	12.7	28208.4	ARATH	Peptidyl-prolyl cis-trans isomerase CYP20-3, chloroplastic
447	[446]	Q42553	IPP2										1	1	7.7				3	4	14.4	32607.8	ARATH	Isopentenyl-diphosphate Delta-isomerase II, chloroplastic
448	[447]	P51407	RPP2A	1	7	8.7	1	5	8.7	1	2	8.7	3	7	27.8	1	4	8.7	3	7	27.8	11451.9	ARATH	60S acidic ribosomal protein P2-1
449	[448]	Q9LF27	WDR12										3	4	8.8	3	4	9.2	2	4	6.5	47338.3	ARATH	Ribosome biogenesis protein WDR12 homolog
450	[449]	A0A178UR82	AXX17_At5g38210										2	2	1.4							210699.7	ARATH	EMB3012
451	[450]	Q9ASV6	RPS20							1	5	4.5	2	4	9.9	2	4	10.9	3	7	16.3	21826.5	ARATH	30S ribosomal protein S20, chloroplastic
452	[451]	P56795	rpl22										2	5	9.4	4	4	25				18586.7	ARATH	50S ribosomal protein L22, chloroplastic
453	[452]	Q9ASS2	FREE1										3	3	5.3							65396.4	ARATH	Protein FREE1
455	[454]	Q8L636	NCL										2	2	4.6				1	1	2.2	63417.3	ARATH	Sodium/calcium exchanger NCL
456	[455]	P23321	PSBO1				1	1	5.1	2	6	12.7							1	2	7.5	35142.7	ARATH	Oxygen-evolving enhancer protein 1-1, chloroplastic
457	[456]	O65398	GLX1										3	5	11.3				2	2	7.4	31928.6	ARATH	Lactoylglutathione lyase GLX1
458	[457]	P13853	HSP17.6C										2	2	18.5				1	1	9.6	17604	ARATH	17.6 kDa class I heat shock protein 3
459	[458]	P46643	ASP1										1	3	4.2				3	6	7.4	47758.1	ARATH	Aspartate aminotransferase, mitochondrial
460	[459]	Q9C5Y0	PLDDELTA										3	4	4.5				2	2	2.6	98917.8	ARATH	Phospholipase D delta
461	[460]	Q8W112	At5g20950										3	4	6.6				2	2	5.8	67927.4	ARATH	Beta-D-glucan exohydrolase-like protein
462	[461]	Q96262	PCAP1										3	3	13.8				3	4	17.3	24584	ARATH	Plasma membrane-associated cation-binding protein 1
463	[462]	Q944R1	At4g13710										2	3	5.1				1	1	2.1	51936.3	ARATH	Probable pectate lyase 15
464	[463]	Q42351	RPL34A				1	3	10	1	2	10	3	5	22.5	1	3	6.7	2	4	16.7	13705.3	ARATH	60S ribosomal protein L34-1
465	[464]	Q9LD43	CAC3										3	3	5.1				1	1	1.7	85306.9	ARATH	Acetyl-coenzyme A carboxylase carboxyl transferase subunit alpha, chloroplastic
467	[466]	O82194	At2g19870										4	4	11.1							64161.8	ARATH	Uncharacterized protein At2g19870
468	[467]	Q41969	EIF2B										3	3	15.3				2	2	10.4	30663.1	ARATH	Eukaryotic translation initiation factor 2 subunit beta
469	[468]	Q94F49	At5g27670	1	8	6	1	5	6	1	6	6	2	4	14	2	5	14	2	4	14	15908.5	ARATH	Probable histone H2A.5
470	[469]	Q9CAA0	At1g79990										2	3	2.3	2	3	2.3	2	3	3.4	103970.2	ARATH	Coatomer subunit beta'-1
471	[470]	Q941A4	OBAP2A										2	2	10.9				2	4	10.1	27846.2	ARATH	Oil body-associated protein 2A
473	[472]	Q9SFF6	PAE12										3	3	7.2							46327.1	ARATH	Pectin acetylesterase 12
474	[473]	Q9FZA2	AGP31										2	4	6.1				1	1	3.9	38489.2	ARATH	Non-classical arabinogalactan protein 31
475	[474]	P56757	atpA	1	3	2.4	1	2	2.6	1	4	2.6	1	1	2.6				5	7	11.6	55328.7	ARATH	ATP synthase subunit alpha, chloroplastic
476	[475]	Q84WT8	CYS4										2	6	18.8				2	4	21.4	12556	ARATH	Cysteine proteinase inhibitor 4
477	[476]	Q6NPM5	ATS3B										2	4	16.3				1	2	10	21071.2	ARATH	Embryo-specific protein ATS3B
478	[477]	Q96291	BAS1										1	1	6				2	4	15.4	29092.2	ARATH	2-Cys peroxiredoxin BAS1, chloroplastic
480	[479]	Q56YP6	At4g23400										2	2	72.7				1	1	18.2	6133.2	ARATH	Water channel-like protein (Fragment)
481	[480]	Q9SK39	MP3																3	4	34	11031.3	ARATH	Probable steroid-binding protein 3
482	[481]	Q9M1R2	At3g62120																2	2	4	60756.1	ARATH	Proline--tRNA ligase, cytoplasmic
483	[482]	O49299	At1g23190										3	3	5.3				3	4	6	63171.1	ARATH	Probable phosphoglucomutase, cytoplasmic 1
484	[483]	Q9ZVD0	SE										3	3	5.6	1	1	2.4				81098.5	ARATH	Serrate RNA effector molecule
485	[484]	P56807	rps18							1	6	8.9	5	14	30.7	1	6	8.9	4	17	23.8	12060.3	ARATH	30S ribosomal protein S18, chloroplastic
486	[485]	Q9LU86	PRXQ																2	4	11.6	23678.2	ARATH	Peroxiredoxin Q, chloroplastic
487	[486]	Q94EY7	MQK4.29										2	2	12							26642.8	ARATH	Uncharacterized protein At5g16550
488	[487]	Q9LIH9	RH51													1	1	2.5	2	2	4.6	63817	ARATH	DEAD-box ATP-dependent RNA helicase 51
489	[488]	P25071	CML12	1	3	3.1							1	1	3.1	2	8	6.5	2	9	6.5	36807.5	ARATH	Calmodulin-like protein 12
491	[490]	Q9LR34											2	2	7.3							35557.7	ARATH	Protein MAK16 homolog
492	[491]	P32961	NIT1										2	2	11.3				3	3	15.6	38152.5	ARATH	Nitrilase 1
493	[492]	Q0WWK6	At5g57655										2	2	3.8				3	4	7.5	53648.3	ARATH	Xylose isomerase
494	[493]	Q6ICZ8	At5g13850																2	3	15.2	22057.6	ARATH	Nascent polypeptide-associated complex subunit alpha-like protein 3
495	[494]	Q94K05	CCT8	1	4	2.2							1	1	3.5	1	1	3.5	2	3	8.7	58940	ARATH	T-complex protein 1 subunit theta
496	[495]	Q9SMW7	BTF3										2	2	10.9				2	3	28.5	17946.4	ARATH	Basic transcription factor 3
497	[496]	P56802	rps11										1	3	10.9	1	3	6.5	2	2	17.4	15023.7	ARATH	30S ribosomal protein S11, chloroplastic
498	[497]	Q8VZH2	APM1																3	3	6.7	98179.7	ARATH	Aminopeptidase M1
499	[498]	Q9SB64	NBR1										3	3	5							76186.7	ARATH	Protein NBR1 homolog
500	[499]	P15457	AT2S1										2	4	17.1							19014	ARATH	2S seed storage protein 1
501	[500]	Q0WR30	At1g78260													1	1	4.4	2	3	10.3	30334.9	ARATH	RNA-binding (RRM/RBD/RNP motifs) family protein
502	[501]	Q94K75	RHON1										4	5	10.7							44530	ARATH	Rho-N domain-containing protein 1, chloroplastic
503	[502]	Q9FJR0	UPF1										4	5	4.5	2	2	2.7				136869.5	ARATH	Regulator of nonsense transcripts 1 homolog
504	[503]	Q0WLY0	At1g33680										3	5	6.8							80439.2	ARATH	KH domain-containing protein
505	[504]	Q9M9A1	At1g48990										2	8	16.6	1	4	4.7				18443.5	ARATH	F27J15.22
506	[505]	Q9FQ03	XRN3										2	2	3.2							116826.7	ARATH	5'-3' exoribonuclease 3
507	[506]	Q9FQ24	TON1B										1	2	4.7				2	2	11.3	29185.5	ARATH	Protein TONNEAU 1b
508	[507]	Q9CA67	CHLP										2	2	8.6				2	2	9	51838	ARATH	Geranylgeranyl diphosphate reductase, chloroplastic
509	[508]	O04202	TIF3F1										1	1	6.1				2	2	12.3	31862.4	ARATH	Eukaryotic translation initiation factor 3 subunit F
510	[509]	Q9SL67	RPT2B										2	3	8.4				2	2	8.4	49347.3	ARATH	26S proteasome regulatory subunit 4 homolog B
511	[510]	P51419	RPL27C				1	3	8.1	1	2	8.1	4	4	28.1				2	3	16.3	15607.7	ARATH	60S ribosomal protein L27-3
512	[511]	Q94EG6	At5g02240																2	4	15.4	27103.1	ARATH	Uncharacterized protein At5g02240
513	[512]	P45434	At2g21160										1	2	5.8				2	4	12.4	28167.6	ARATH	Translocon-associated protein subunit alpha
514	[513]	Q9FMN0	SCP2										2	3	17.1				2	4	17.1	13568	ARATH	Sterol carrier protein 2
515	[514]	Q9SI54	LSM7										2	2	25.3							10773.4	ARATH	Sm-like protein LSM7
517	[516]	Q9LW12	LEA29										2	4	10.7							24186.3	ARATH	Late embryogenesis abundant protein 29
518	[517]	Q94JM0	At5g66420																2	3	3.7	70033.8	ARATH	AT5g66420/K1F13_7
520	[519]	Q9FFS8	RPS10B										2	4	17.8	1	2	6.7	2	3	17.8	19733.4	ARATH	40S ribosomal protein S10-2
521	[520]	Q38946	GDH2										1	1	2.2	2	2	5.1	4	6	12.9	44699.4	ARATH	Glutamate dehydrogenase 2
522	[521]	Q9FLX7	At5g52840										2	2	14.2	2	2	16.6	2	2	24.3	19179.1	ARATH	Probable NADH dehydrogenase [ubiquinone] 1 alpha subcomplex subunit 5, mitochondrial
523	[522]	A0A178UY46	AXX17_At4g24640																2	5	15.7	23795.3	ARATH	PSBQA
524	[523]	Q8W034	RNP1										3	4	11.4							42353.7	ARATH	Heterogeneous nuclear ribonucleoprotein 1
525	[524]	Q8LDQ8	At5g24165										2	3	41.3							7756	ARATH	At5g24165
526	[525]	P16180	RPS17										3	5	26.2				2	3	12.8	16282.2	ARATH	30S ribosomal protein S17, chloroplastic
527	[526]	Q43348	BFRUCT3										1	1	2.5				3	3	6.6	72228.8	ARATH	Acid beta-fructofuranosidase 3, vacuolar
528	[527]	Q9LID3	At3g13670										2	2	4							78640.2	ARATH	Casein kinase-like protein
529	[528]	Q0WQH0	At1g43190										2	2	7.2				1	1	4.4	48234.1	ARATH	Uncharacterized protein At1g43190
530	[529]	Q8GW48	HSBP																2	5	30.2	9347.3	ARATH	Heat shock factor-binding protein
531	[530]	O23404	PPDK																2	4	3.7	105138.9	ARATH	Pyruvate, phosphate dikinase 1, chloroplastic
532	[531]	O22686	F19P19.5				2	3	11.5	2	2	11.5	3	8	16.6	1	3	6.4	2	6	11.5	16998.3	ARATH	F19P19.5 protein
533	[532]	Q8LA03											3	3	10.5							39967.1	ARATH	Leucine rich repeat protein, putative
534	[533]	Q944K2	OST48										2	3	5.9							48744.7	ARATH	Dolichyl-diphosphooligosaccharide--protein glycosyltransferase 48 kDa subunit
535	[534]	Q8L7N0	CCT6B										2	2	4.1				3	5	6.2	58928.4	ARATH	T-complex protein 1 subunit zeta 2
536	[535]	Q9FJH6	ABCF1										3	3	5.5				2	3	3.7	66886.2	ARATH	ABC transporter F family member 1
537	[536]	O81148	PAC1										1	2	4.8				2	2	11.2	27475.5	ARATH	Proteasome subunit alpha type-4-A
538	[537]	Q42338	T24C20_20										2	5	25							10019.7	ARATH	AT3G48140 protein
540	[539]	Q94BT9	ATX1										2	2	26.3				2	2	34.2	8158.5	ARATH	Copper transport protein ATX1
541	[540]	Q9LY66	RPL1										2	2	8.1				2	3	8.1	37632.7	ARATH	50S ribosomal protein L1, chloroplastic
542	[541]	Q9SA78	At1g30630													1	2	5.1	2	3	9.9	32602.4	ARATH	Coatomer subunit epsilon-1
543	[542]	Q9CAF4	NUP1										2	2	2.2							135933.7	ARATH	Nuclear pore complex protein NUP1
545	[544]	Q7PC86	ABCG35										2	2	1.5				3	3	2	162571.9	ARATH	ABC transporter G family member 35
546	[545]	Q9M1J6	SSL9										2	2	9.5							41458.2	ARATH	Protein STRICTOSIDINE SYNTHASE-LIKE 9
547	[546]	Q8RWN5	RZ1C										4	9	11.3							33486.5	ARATH	Glycine-rich RNA-binding protein RZ1C
548	[547]	Q0WUY5	At3g07660										2	2	4.2							90076.5	ARATH	Flocculation protein (DUF1296)
550	[549]	Q8VZR8	At4g28300										3	4	7.7							54107.2	ARATH	Formin-like protein (DUF1421)
551	[550]	O49570	At4g31200										2	2	3.8							72497.1	ARATH	At4g31200
552	[551]	Q0WNN2	At1g72150										3	4	22							15611.7	ARATH	Putative cytosolic factor protein (Fragment)
553	[552]	O04834	SAR1A										1	1	6.7	1	2	6.7	2	2	12.4	22030.7	ARATH	GTP-binding protein SAR1A
554	[553]	P42732	RPS13										2	2	6.5	1	1	5.9				19096.7	ARATH	30S ribosomal protein S13, chloroplastic
556	[555]	Q9SSK9	MLP28										5	6	14.9	1	1	2.4	1	1	2.4	37614.9	ARATH	MLP-like protein 28
558	[557]	Q0WWW3	At5g28840										2	2	6.6				2	2	8.2	42758.9	ARATH	GDP-mannose 3',5'-epimerase
559	[558]	O24456	RACK1A										2	2	6.1	2	4	6.1	3	4	9.5	35747.9	ARATH	Receptor for activated C kinase 1A
560	[559]	Q9LYK5	T15N1_30										3	5	8.9							57144.7	ARATH	Uncharacterized protein T15N1_30
561	[560]	O49607	SBT1.6										2	3	3	2	2	3.3				81047	ARATH	Subtilisin-like protease SBT1.6
562	[561]	Q9SKZ3	RPS12C										2	3	16							15328.9	ARATH	40S ribosomal protein S12-2
564	[563]	A8MRE8	TIM																2	2	12.4	32306.8	ARATH	Triosephosphate isomerase
565	[564]	P06525	ADH1										3	3	13.7							41178.5	ARATH	Alcohol dehydrogenase class-P
566	[565]	O80480	IMPA4										1	1	2.4				2	3	4.3	59446.3	ARATH	Importin subunit alpha-4
568	[567]	Q9SYT0	ANN1										2	2	9.1				2	3	9.1	36203.9	ARATH	Annexin D1
569	[568]	O23715	PAG1										2	4	8.8				3	4	12	27377.6	ARATH	Proteasome subunit alpha type-3
570	[569]	Q8L773	ALY1										3	3	15.2				2	2	10.2	25755.5	ARATH	THO complex subunit 4A
571	[570]	Q9S7L9	COX6B-1																2	3	12	21195	ARATH	Cytochrome c oxidase subunit 6b-1
572	[571]	Q9S7Y7	XYL1										2	3	2.6	1	2	1.3				102399.6	ARATH	Alpha-xylosidase 1
574	[573]	Q9LK61	RPS10										2	2	9.4				1	1	6.3	20837.4	ARATH	30S ribosomal protein S10, chloroplastic
576	[575]	Q9LIK9	APS1	1	2	2.2													3	4	11	51459.4	ARATH	ATP sulfurylase 1, chloroplastic
578	[577]	Q0WNG9	At3g23750													1	1	3.7	2	2	9.5	30480.5	ARATH	Putative receptor-like kinase
579	[578]	O23264	SBP1																3	3	8.2	54057.6	ARATH	Selenium-binding protein 1
580	[579]	Q3E870	SDH7B										2	4	11				1	2	10	10859.8	ARATH	Succinate dehydrogenase subunit 7B, mitochondrial
581	[580]	O81126	RSZ22										1	2	3.5				3	3	15	22458	ARATH	Serine/arginine-rich splicing factor RSZ22
582	[581]	O80576	late embryogenesis abundant 26										2	2	7.4				3	4	11.4	36036.6	ARATH	At2g44060
583	[582]	Q93XW5	NSP5										2	2	7.1				1	2	3.7	35853.6	ARATH	Nitrile-specifier protein 5
584	[583]	Q7DLR9	PBG1										2	2	15.9							27651.6	ARATH	Proteasome subunit beta type-4
586	[585]	Q9ZW06	APUM2										2	3	2.4				1	1	1	106656.3	ARATH	Pumilio homolog 2
587	[586]	Q9LUW5	RH53										2	3	4.5							65359.9	ARATH	DEAD-box ATP-dependent RNA helicase 53, mitochondrial
588	[587]	P42742	PBF1													1	1	7.6	2	3	11.7	24644.3	ARATH	Proteasome subunit beta type-1
589	[588]	Q9SVP6	PRR2																2	3	7.6	35415.8	ARATH	Pinoresinol reductase 2
590	[589]	P38666	RPL24B										2	6	14.7	1	4	7.4	1	5	7.4	18632.1	ARATH	60S ribosomal protein L24-2
591	[590]	Q8VZM1	NAA15										2	2	2.1				3	3	3.9	102147.6	ARATH	N-terminal acetyltransferase A complex auxiliary subunit NAA15
594	[593]	Q42290	At3g02090										2	2	3.4				2	2	8.7	59160.4	ARATH	Probable mitochondrial-processing peptidase subunit beta, mitochondrial
596	[595]	Q42589	LTP1																2	4	16.1	11755	ARATH	Non-specific lipid-transfer protein 1
598	[597]	Q8S9J8	At4g32285										2	2	3	2	3	5	1	2	1.6	70555.3	ARATH	Probable clathrin assembly protein At4g32285
601	[600]	Q9SMT7	AAE3										2	3	5.3	1	1	2.9	1	2	2.9	55544.8	ARATH	Oxalate--CoA ligase
603	[602]	Q8L719	ALY2										2	2	6.5							30780.1	ARATH	THO complex subunit 4B
605	[604]	Q08682	RPSaA																4	5	14.1	32291.7	ARATH	40S ribosomal protein Sa-1
608	[607]	Q681K2	ATS3A										1	3	6.7	1	2	6.7	2	3	12.3	19949.1	ARATH	Embryo-specific protein ATS3A
609	[608]	Q944A6	SNF4										2	3	4.3							53466.7	ARATH	Sucrose nonfermenting 4-like protein
610	[609]	P46645	ASP2										2	3	6.7	1	1	3.5	2	2	5.7	44267	ARATH	Aspartate aminotransferase, cytoplasmic isozyme 1
611	[610]	O49613	HIPP25										2	2	13.7							17162.6	ARATH	Heavy metal-associated isoprenylated plant protein 25
612	[611]	Q9M7T0	PRXIIF										1	1	9				2	3	13.9	21445.6	ARATH	Peroxiredoxin-2F, mitochondrial
615	[614]	Q940P8	CCT2										1	2	2.3	1	1	2.3	2	3	4.4	57286.5	ARATH	T-complex protein 1 subunit beta
616	[615]	A0A178U9L0	AXX17_At5g33450										3	3	9.8							33209.3	ARATH	Uncharacterized protein
618	[617]	A0A178VZS4	AXX17_At2g17700																2	2	1.2	230678	ARATH	POM2
619	[618]	Q8RWF0	RPN9A										3	3	8.8							44168.2	ARATH	26S proteasome non-ATPase regulatory subunit 13 homolog A
621	[620]	Q9ZNT0	SKD1										1	1	2.8				2	2	5.3	48593.4	ARATH	Protein SUPPRESSOR OF K(+) TRANSPORT GROWTH DEFECT 1
622	[621]	Q9SGW3	RPN12A										2	2	9.4				1	2	5.2	30706.2	ARATH	26S proteasome non-ATPase regulatory subunit 8 homolog A
626	[625]	Q9SGZ5	BXL7																3	3	7.2	83892.5	ARATH	Probable beta-D-xylosidase 7
628	[627]	Q9SIN2	TBL39										2	2	5.2							43165.9	ARATH	Protein trichome birefringence-like 39
630	[629]	O64517	AMC4																2	3	5.7	45484.2	ARATH	Metacaspase-4
633	[632]	Q9S709	U2AF35A										3	3	11.5	1	1	6.1	2	2	8.1	34572.6	ARATH	Splicing factor U2af small subunit A
634	[633]	Q8RXA7	SCD1										2	2	2.3							131594	ARATH	DENN domain and WD repeat-containing protein SCD1
637	[636]	Q9LNV0	At1g07310										3	3	13.1							39013.9	ARATH	Calcium-dependent lipid-binding (CaLB domain) family protein
638	[637]	Q8RWN9	At3g13930										3	3	6.5							58468.2	ARATH	Dihydrolipoyllysine-residue acetyltransferase component 2 of pyruvate dehydrogenase complex, mitochondrial
639	[638]	Q84VW9	PPC3										2	2	2.1				2	2	2.1	110160.6	ARATH	Phosphoenolpyruvate carboxylase 3
640	[639]	Q9STN3	At4g08350										2	2	2.3							115406.3	ARATH	Putative transcription elongation factor SPT5 homolog 1
641	[640]	Q9FJ95	SDH																3	3	12.9	39256	ARATH	Sorbitol dehydrogenase
643	[642]	Q8L7U4	P23-1										2	2	10.4				1	1	5.8	25471	ARATH	Co-chaperone protein p23-1
644	[643]	O82662	At2g20420										2	2	6.9				1	1	3.8	45346	ARATH	Succinate--CoA ligase [ADP-forming] subunit beta, mitochondrial
646	[645]	Q9SJL9	XTH32										2	5	6.4	1	1	4	2	3	6.4	34482.5	ARATH	Probable xyloglucan endotransglucosylase/hydrolase protein 32
649	[648]	P56765	accD										2	2	5.1	1	1	2.9	2	2	4.7	55636.5	ARATH	Acetyl-coenzyme A carboxylase carboxyl transferase subunit beta, chloroplastic
650	[649]	Q96255	PSAT1																2	2	6.3	47359.8	ARATH	Phosphoserine aminotransferase 1, chloroplastic
651	[650]	O22315	SR34										2	2	9.6				1	2	4	33729.5	ARATH	Serine/arginine-rich-splicing factor SR34
657	[656]	O22715	AP1M2										2	2	6.8							49032.7	ARATH	AP-1 complex subunit mu-2
658	[657]	Q8LCW9	RPP1A										1	1	34.8				2	2	58.9	11161.8	ARATH	60S acidic ribosomal protein P1-1
660	[659]	O82628	VHA-G1										3	3	20							12397	ARATH	V-type proton ATPase subunit G1
661	[660]	O82399	PMDH1										2	4	6.8							37465.9	ARATH	Malate dehydrogenase 1, peroxisomal
666	[665]	O23138	CYTC-1																2	5	18.4	12394.2	ARATH	Cytochrome c-1
668	[667]	P49637	RPL27AC				2	3	13.7				1	2	8.2				2	2	15.1	16455.5	ARATH	60S ribosomal protein L27a-3
669	[668]	P01826					1	20	6.9	1	13	6.9	2	6	14.7							12349	RABIT	Ig heavy chain V-A1 region BS-5
670	[669]	Q0WPK4	PAT1										3	3	4							88841.2	ARATH	Protein PAT1 homolog
671	[670]	Q9FJX2	RPL26B										4	7	16.4	1	1	5.5				16790.6	ARATH	60S ribosomal protein L26-2
672	[671]	Q8L7W0	SH3P3																2	2	6.6	39534.1	ARATH	SH3 domain-containing protein 3
674	[673]	Q9SJ12	At2g21870										1	1	5				2	2	9.6	27597.1	ARATH	Probable ATP synthase 24 kDa subunit, mitochondrial
678	[677]	Q9S791	F15H11.2										1	1	1.5				2	2	3.6	66865.1	ARATH	AT1G70770 protein
679	[678]	Q9SS01	AAE20										2	3	5.2							64941.7	ARATH	Benzoate--CoA ligase, peroxisomal
680	[679]	Q94CE5	POP2										2	2	6				2	2	6	55188	ARATH	Gamma-aminobutyrate transaminase POP2, mitochondrial
682	[681]	Q9SV20	At4g31490										2	3	2.6	2	2	2.8	1	1	1.2	106078.8	ARATH	Coatomer subunit beta-2
683	[682]	Q84WV1	CCT3																2	3	4	60340	ARATH	T-complex protein 1 subunit gamma
688	[687]	Q9SZ15	LIP5										2	2	6.9							46218.2	ARATH	Protein HOMOLOG OF MAMMALIAN LYST-INTERACTING PROTEIN 5
690	[689]	Q9SZV4	At4g30010										2	5	18.9	1	4	10				10439	ARATH	AT4g30010/F6G3_40
695	[694]	A0A178W925	AXX17_At1g12880																2	2	2.5	112350.9	ARATH	Uncharacterized protein
696	[695]	Q42580	PER21										1	1	4.9				2	2	9.2	36741.5	ARATH	Peroxidase 21
697	[696]	Q8LFM3														2	5	5.7				60864.8	ARATH	Pectinesterase-like protein
698	[697]	Q94JS0	UCR1-1																2	3	7.7	29607.8	ARATH	Cytochrome b-c1 complex subunit Rieske-1, mitochondrial
700	[699]	Q9C5Z2	TIF3H1																2	2	5.6	38373	ARATH	Eukaryotic translation initiation factor 3 subunit H
704	[703]	Q9ZPH2	GRXS17																2	3	7	53115.7	ARATH	Monothiol glutaredoxin-S17
707	[706]	Q945P1	EULS3										2	3	7.9							35648.2	ARATH	Ricin B-like lectin EULS3
708	[707]	Q42521	GAD1	1	2	1.8							2	3	5.4	2	4	3.4	2	2	3.4	57066.9	ARATH	Glutamate decarboxylase 1
709	[708]	Q9SF16	CCT7										2	2	4.5				2	2	4.8	59776.9	ARATH	T-complex protein 1 subunit eta
710	[709]	O22263	PDIL2-1										2	2	6.4				2	3	5.5	39497.3	ARATH	Protein disulfide-isomerase like 2-1
711	[710]	Q9SVI9	CFM4										2	2	15.9							33271.4	ARATH	At4g39040
715	[714]	Q94II5	RD2										2	2	15.5				1	1	9.3	21253.5	ARATH	Adenine nucleotide alpha hydrolases-like superfamily protein
717	[716]	Q9LPV8	ERF1-2										1	1	2.5				2	2	5.8	48941.7	ARATH	Eukaryotic peptide chain release factor subunit 1-2
718	[717]	O04486	RABA2A										2	2	10.1				1	2	5.1	24108.4	ARATH	Ras-related protein RABA2a
722	[721]	Q67ZP4	At5g44500										4	4	15.7							26974.7	ARATH	Small nuclear ribonucleoprotein-associated protein
723	[722]	O22860	RPL38A										2	6	27.5				2	7	27.5	8121.7	ARATH	60S ribosomal protein L38
724	[723]	Q38900	CYP19-1										2	2	14.5				3	4	17.9	18492.1	ARATH	Peptidyl-prolyl cis-trans isomerase CYP19-1
728	[727]	Q56XB4											2	2	4.9	1	1	2.1	1	1	2.1	60084.4	ARATH	Eukaryotic translation initiation factor 3 subunit L
729	[728]	Q94CE4	BCA4													1	1	4.3	3	3	10.4	30836.6	ARATH	Beta carbonic anhydrase 4
730	[729]	Q9SSF1	SMD1A										2	2	27.2				1	1	17.5	12599.9	ARATH	Small nuclear ribonucleoprotein SmD1a
733	[732]	Q9SZV0	RNC1										2	2	3.9							62432.8	ARATH	Ribonuclease III domain-containing protein RNC1, chloroplastic
735	[734]	A0A178V2I8	AXX17_At4g05970										2	3	14.4							13042.3	ARATH	Histone H2A
737	[736]	Q96511	PER69										3	4	10.9				1	2	5.4	35679.2	ARATH	Peroxidase 69
739	[738]	Q9LII2	At3g18570										2	2	13.9				1	2	5.4	18134.9	ARATH	Oleosin family protein
742	[741]	Q93VK7	At5g14910																2	2	19.7	18956.6	ARATH	AT5g14910/F2G14_30
743	[742]	Q38970	ACC1																2	3	1.2	251383.9	ARATH	Acetyl-CoA carboxylase 1
754	[753]	O81845	PUMP1										2	3	7.2				2	3	5.9	32662.5	ARATH	Mitochondrial uncoupling protein 1
757	[756]	O23049	RPL6										2	3	8.5							24705.8	ARATH	50S ribosomal protein L6, chloroplastic
758	[757]	Q9ZUB3	SPDSYN1																2	2	8.1	36553.8	ARATH	Spermidine synthase 1
761	[760]	Q8VYN9	PHOS32										3	3	20.2							26202.6	ARATH	Universal stress protein PHOS32
764	[763]	Q8L5U8											1	1	2.5				2	2	6.2	53685.1	ARATH	Rubisco expression protein, putative
769	[768]	Q9M060	EIF6-2				2	2	9.4				1	1	4.9							26482.2	ARATH	Eukaryotic translation initiation factor 6-2
771	[770]	O22873	BZIP18										2	2	10.4							40667.1	ARATH	bZIP transcription factor 18
772	[771]	O49006	PME3										1	2	2.2	1	1	2.2	2	2	4.1	64256.5	ARATH	Pectinesterase/pectinesterase inhibitor 3
773	[772]	Q9C928	BRIX1-2										2	2	7.8	1	1	2.8	2	4	6.2	36697	ARATH	Ribosome biogenesis protein BRX1 homolog 2
775	[774]	Q43316	HEMC																3	4	7.9	41043.6	ARATH	Porphobilinogen deaminase, chloroplastic
776	[775]	O04922	GPX2																2	3	12.4	18944.7	ARATH	Probable glutathione peroxidase 2
789	[788]	P29402	CNX1										2	2	5.7				1	2	3.2	60486.7	ARATH	Calnexin homolog 1
796	[795]	Q42522	GSA2																2	2	5.7	50142	ARATH	Glutamate-1-semialdehyde 2,1-aminomutase 2, chloroplastic
797	[796]	O22795	RPL28										2	5	9.8	1	3	4.9				16033.1	ARATH	50S ribosomal protein L28, chloroplastic
805	[804]	P56805	rps15																2	3	21.6	10718.6	ARATH	30S ribosomal protein S15, chloroplastic
806	[805]	Q9LJ97	RAB28										2	2	11.1							26743.9	ARATH	Late embryogenesis abundant protein 31
807	[806]	Q9FKB0	LSM5																2	2	25	9658.2	ARATH	Sm-like protein LSM5
808	[807]	Q9FL43											2	2	4.3				2	2	3.4	46919.7	ARATH	At5g07030
811	[810]	Q0WVZ3	At2g46280										2	2	6.4				2	2	7	36388.4	ARATH	Eukaryotic translation initiation factor 3 subunit I
816	[815]	Q9LUL3											2	2	3.2	1	1	1.6				58288.1	ARATH	Uncharacterized protein
817	[816]	P36210	RPL12A										1	2	4.7				2	2	8.9	20075	ARATH	50S ribosomal protein L12-1, chloroplastic
838	[837]	Q0WU28	At2g03510										2	2	6.1				1	1	2.6	38959.9	ARATH	Uncharacterized protein At2g03510 (Fragment)
839	[838]	Q0WV19	At5g57110										2	2	2.1							116175.1	ARATH	Calcium-transporting ATPase
840	[839]	Q9SIV2	RPN1A										1	1	1.1	1	3	1.1	2	3	2.1	98145.3	ARATH	26S proteasome non-ATPase regulatory subunit 2 homolog A
843	[842]	Q9FH46	At5g61970										2	2	3.8							68833.1	ARATH	Signal recognition particle subunit SRP68
854	[853]	P30184	LAP1																2	2	3.8	54509.8	ARATH	Leucine aminopeptidase 1
862	[861]	O04603	RPL5										2	2	8				2	3	8	28344	ARATH	50S ribosomal protein L5, chloroplastic
867	[866]	Q9M8L6	PTAC17										2	2	6.5				1	1	3.6	49488	ARATH	At1g80480
872	[871]	Q9SEU8	TRXM2																2	2	13.4	20312.6	ARATH	Thioredoxin M2, chloroplastic
876	[875]	Q93YV7	At4g14360										2	2	3.1				1	2	1.6	69237.5	ARATH	Probable methyltransferase PMT3
878	[877]	Q9FH82	PAE11																2	2	5.1	42009.5	ARATH	Pectin acetylesterase 11
883	[882]	Q9M9K1	At3g08590																2	2	5.7	60764.3	ARATH	Probable 2,3-bisphosphoglycerate-independent phosphoglycerate mutase 2
888	[887]	Q9SLA8	MOD1																2	2	8.2	41214.2	ARATH	Enoyl-[acyl-carrier-protein] reductase [NADH], chloroplastic
893	[892]	A0A178V0N8	AXX17_At4g02960																2	3	2.5	90293	ARATH	Exocyst complex component
900	[899]	Q9SDS7	VHA-C																2	2	6.1	42619.7	ARATH	V-type proton ATPase subunit C
905	[904]	Q9CAD1	At1g63660																2	2	5.6	59315.6	ARATH	At1g63660
906	[905]	Q9ZPI6	AIM1										2	3	2.5				1	1	1.2	77858.8	ARATH	Peroxisomal fatty acid beta-oxidation multifunctional protein AIM1
907	[906]	P59169	HTR4										2	5	10.3	2	4	10.3	2	6	10.3	15406.2	ARATH	Histone H3.3
908	[907]	Q8GUG7	RH50										2	3	3.7							87429.3	ARATH	DEAD-box ATP-dependent RNA helicase 50
909	[908]	Q9C5M0	DTC										3	3	11.7				1	1	4	31912.7	ARATH	Mitochondrial dicarboxylate/tricarboxylate transporter DTC
912	[911]	P49692	RPL7AA							2	3	7	1	2	3.1							29129.9	ARATH	60S ribosomal protein L7a-1
921	[920]	Q9LP45	RPN6																2	2	4.8	46749.7	ARATH	26S proteasome non-ATPase regulatory subunit 11 homolog
925	[924]	Q8LAH7	OPR1																2	2	5.6	41168	ARATH	12-oxophytodienoate reductase 1
929	[928]	O23685	AAP19-2										2	2	13.6							18914.1	ARATH	AP-1 complex subunit sigma-2
931	[930]	A0A1P8B065	MES6										2	2	9.2							30598.9	ARATH	Methyl esterase 6
933	[932]	Q940A6	At4g19440	1	16	0.7	1	13	0.7	1	10	0.7	2	3	0.7				1	5	0.7	94618.1	ARATH	Pentatricopeptide repeat-containing protein At4g19440, chloroplastic
943	[942]	Q0WMZ5	OEP162										2	3	7.9							18714.2	ARATH	Outer envelope pore protein 16-2, chloroplastic
945	[944]	A0A178VIU0	AXX17_At3g05080																2	3	4.1	57919.8	ARATH	Uncharacterized protein
947	[946]	Q9C912	RPL35AC																2	4	12.5	12916.1	ARATH	60S ribosomal protein L35a-3
953	[952]	P55034	RPN10										2	2	9.6							40757.7	ARATH	26S proteasome non-ATPase regulatory subunit 4 homolog
956	[955]	Q8W4J2	MPK16										2	2	2.6							64912.7	ARATH	Mitogen-activated protein kinase 16
962	[961]	C0LGN2	LRR-RLK																2	4	2.3	112277.5	ARATH	Probable leucine-rich repeat receptor-like serine/threonine-protein kinase At3g14840
963	[962]	Q9FIB6	RPN5A										2	3	4.1							50837.7	ARATH	26S proteasome non-ATPase regulatory subunit 12 homolog A
968	[967]	Q9M9M9	At3g03100										2	2	11.9							18316.9	ARATH	Probable NADH dehydrogenase [ubiquinone] 1 alpha subcomplex subunit 12
979	[978]	Q9SCP9	VPS37-1										2	2	8.3							24940.3	ARATH	Vacuolar protein-sorting-associated protein 37 homolog 1
989	[988]	Q93VS8	emb2734																2	2	2.3	123826.7	ARATH	ARM repeat superfamily protein
990	[989]	P24101	PER33													2	5	4.2				38941.6	ARATH	Peroxidase 33
1003	[1002]	Q0WVD2	At4g29060																2	2	4.1	67552.9	ARATH	Elongation factor Ts (Fragment)
